# Supplementary material for: Genomic analysis identifies unique signatures predictive of brain, lung, and liver relapse
Source: Springer Nature journal article supplement (doi:10.1007/s10549-011-1619-7), 2011-06-13
Supplement: MOESM2 [file 8843484]

# Supplemental Table 1

| <b>Module Name</b> | <b>SAM Fold Change</b> | <b>SAM statistic</b> | <b>SAM q-value(%)</b> | <b>Top GO BP Term</b>             |
|--------------------|------------------------|----------------------|-----------------------|-----------------------------------|
| ECM                | 0.925066985            | -2.206647375         | 0                     | cell adhesion                     |
| MM_Green1          | 0.921426605            | -2.070898374         | 0                     | cell adhesion                     |
| MM_Green20         | 0.916312804            | -2.16781447          | 0                     | cell adhesion                     |
| MM_Red9            | 0.911965395            | -2.228035347         | 0                     | response to wounding              |
| HS_Red3            | 0.882825748            | -2.076421672         | 0                     | cell adhesion                     |
| HS_Green4          | 0.882029479            | -2.343697621         | 0                     | cell adhesion                     |
| MVEGFC             | 0.87174068             | -2.733978471         | 0                     | extracellular matrix organization |
| SDDP               | 0.843887655            | -2.183204007         | 0                     | T cell activation                 |
| HS_Red7            | 0.841144303            | -2.412397532         | 0                     | cell adhesion                     |
| MECM               | 0.839578102            | -2.434180239         | 0                     | extracellular matrix organization |
| Fibromatosis       | 0.837814703            | -2.361751552         | 0                     | cell adhesion                     |
| HS_Green9          | 0.789094653            | -2.311605525         | 0                     | cell adhesion                     |
| HS_Red21           | 0.77468639             | -2.422511041         | 0                     | cell adhesion                     |
| Fibroblast_Cluster | 0.73082907             | -2.653199838         | 0                     | cell adhesion                     |

# Supplemental Table 2

| Dataset  | GEO      | # of Tumors | Treatment    |          | Age          | ER  |     |     | PR  |     |     | HER2 |     |     | LN  |     |
|----------|----------|-------------|--------------|----------|--------------|-----|-----|-----|-----|-----|-----|------|-----|-----|-----|-----|
|          |          |             | Chemotherapy | Hormonal | Years (mean) | +   | -   | N/A | +   | -   | N/A | +    | -   | N/A | +   | -   |
| EMC286   | GSE2034  | 286         | 0%           | 0%       | 54           | 209 | 77  | 0   | 166 | 107 | 13  | 207  | 46  | 33  | 0   | 286 |
| EMC192   | GSE12276 | 192         | 19%          | 20%      | 52           | 116 | 73  | 3   | 92  | 90  | 10  | 38   | 132 | 22  | 0   | 192 |
| MSK82    | GSE2603  | 82          | 84%          | 65%      | 56           | 46  | 36  | 0   | 36  | 46  | 0   | 18   | 58  | 6   | 54  | 28  |
| NKI295   | N/A      | 295         | 37%          | 14%      | 44           | 225 | 70  | 0   | 0   | 0   | 295 | 0    | 0   | 295 | 104 | 191 |
| Combined | N/A      | 855         | 25%          | 15%      | 50           | 596 | 256 | 3   | 294 | 243 | 318 | 263  | 236 | 356 | 158 | 697 |

# Supplemental Figure 1

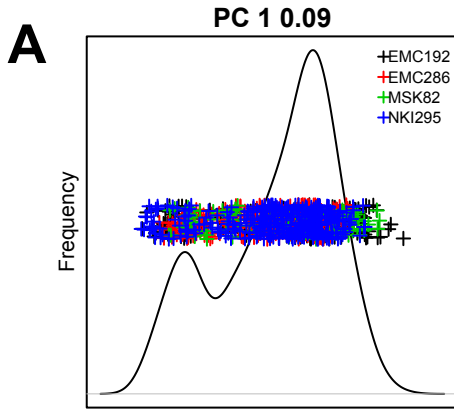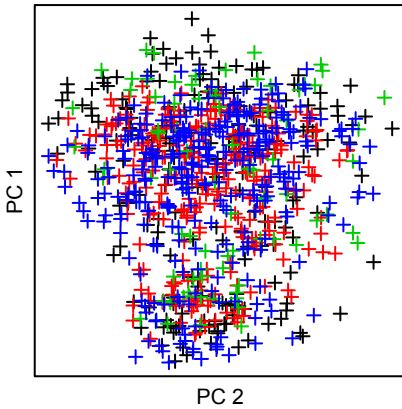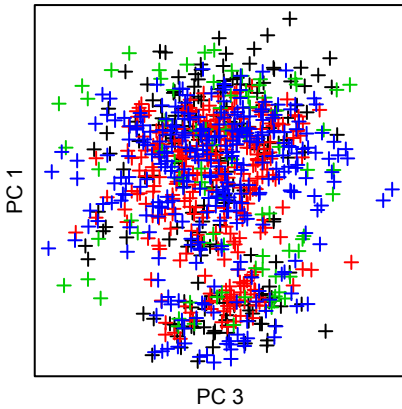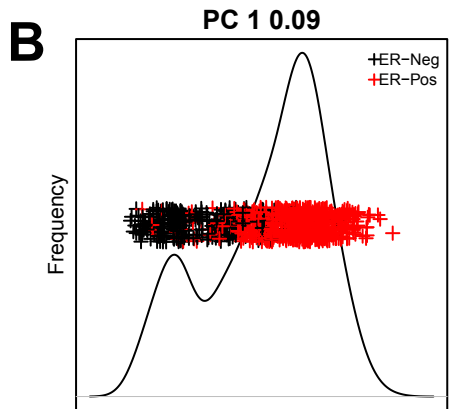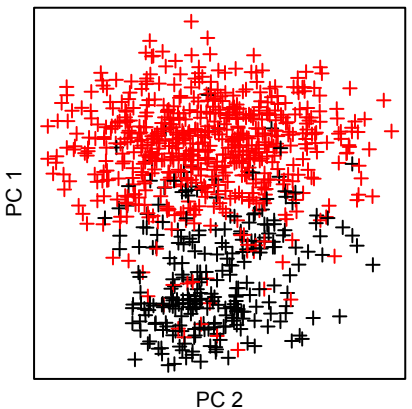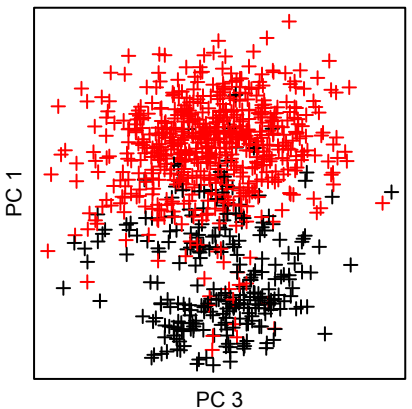

# Supplemental Figure 2

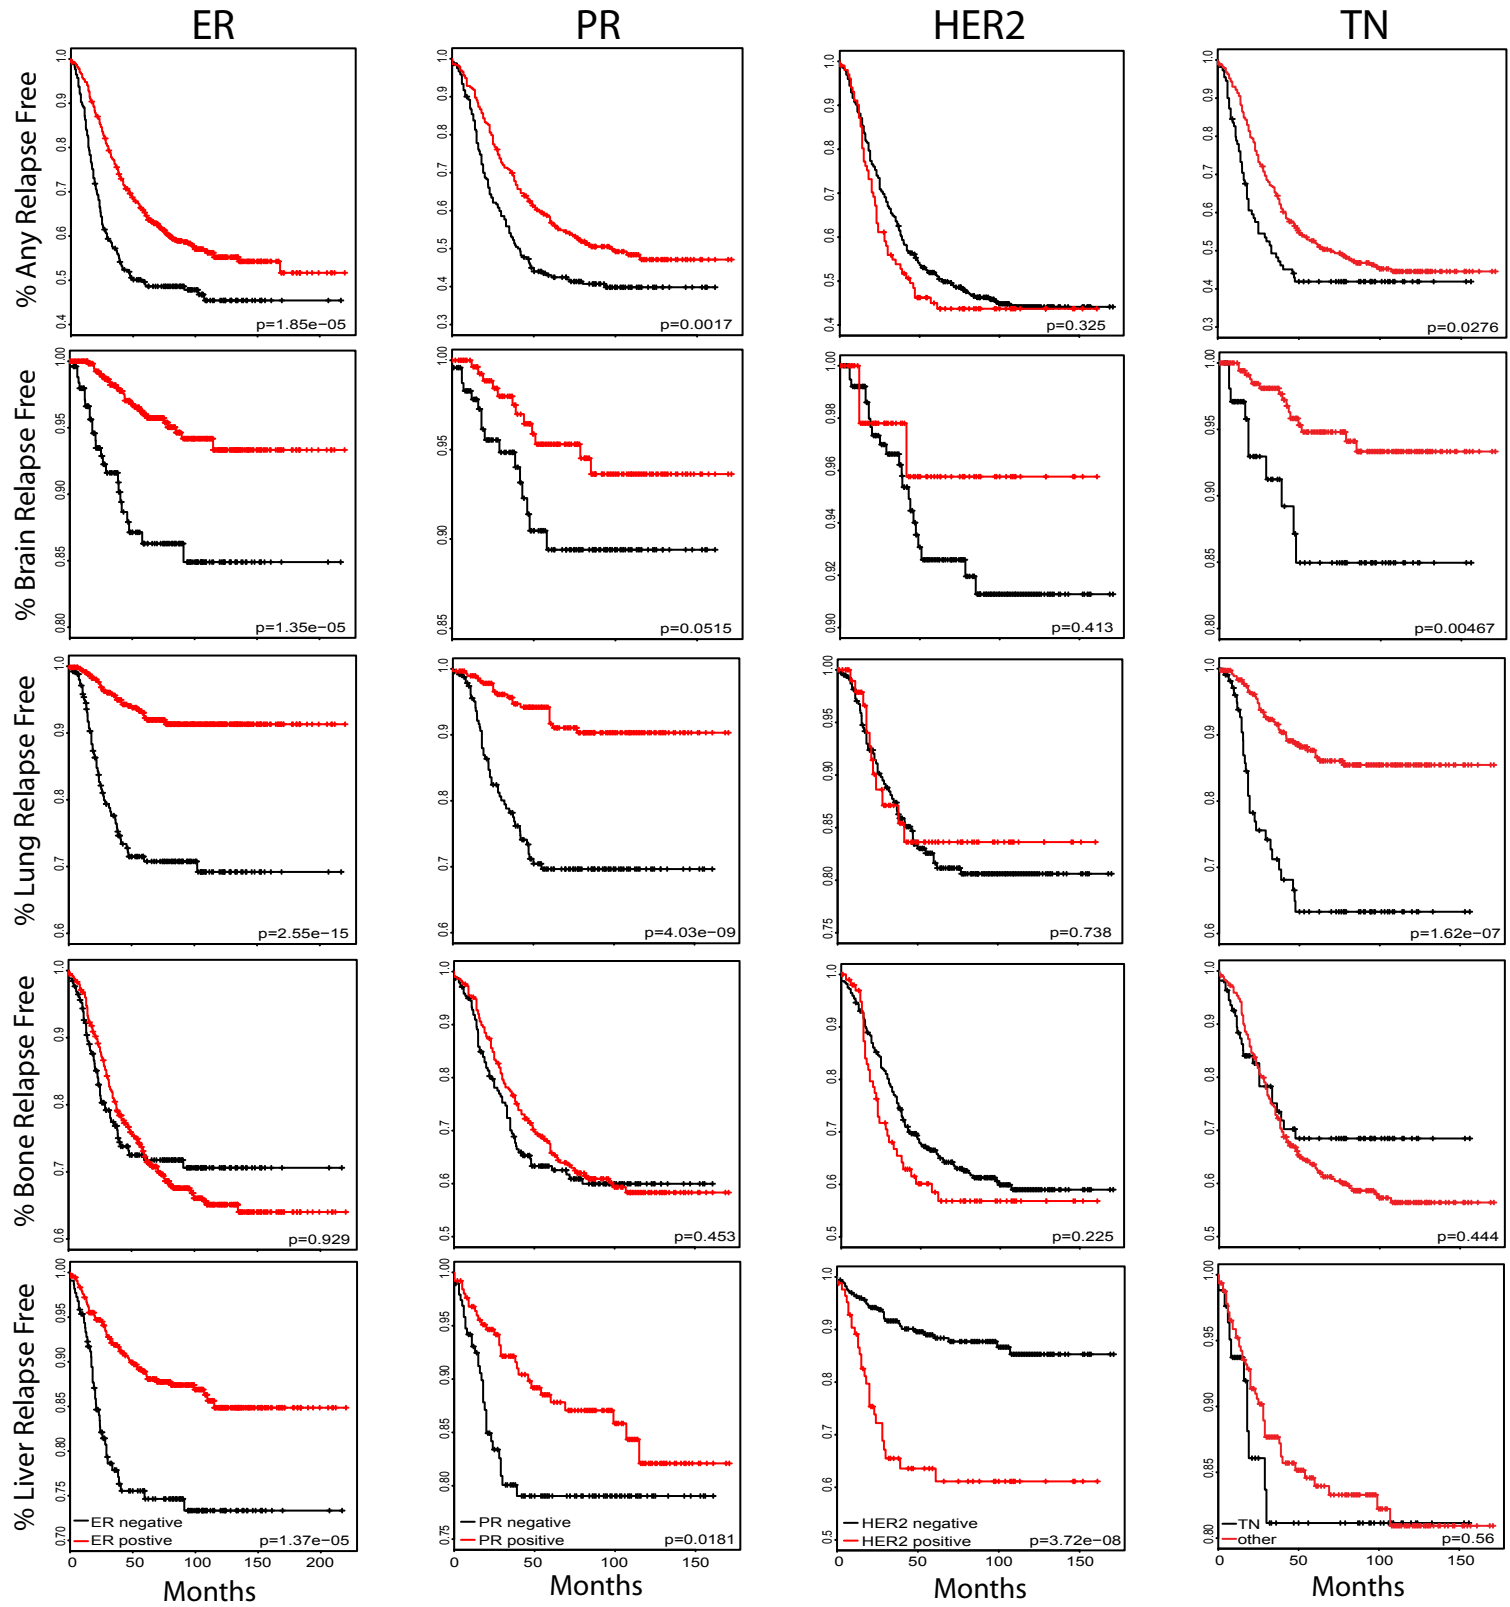

**Supplemental Table 3**

See excel file for complete table

| GEO array# | GEO#     | Cohort | Other Patient ID | Subtype | MFS | Any relapse | Brain relapse | Lung relapse | Bone relapse | Liver relapse |
|------------|----------|--------|------------------|---------|-----|-------------|---------------|--------------|--------------|---------------|
| GSM308258  | GSE12276 | EMC192 | chemo3           | Basal   | 23  | 1           | 0             | 0            | 0            | 0             |
| GSM308261  | GSE12276 | EMC192 | chemo6           | Basal   | 18  | 1           | 1             | 1            | 0            | 1             |
| GSM308273  | GSE12276 | EMC192 | chemo18          | Basal   | 19  | 1           | 0             | 1            | 0            | 0             |
| GSM308275  | GSE12276 | EMC192 | chemo20          | Basal   | 7   | 1           | 0             | 0            | 1            | 0             |
| GSM308281  | GSE12276 | EMC192 | chemo26          | Basal   | 5   | 1           | 0             | 0            | 0            | 0             |
| GSM308283  | GSE12276 | EMC192 | chemo28          | Basal   | 13  | 1           | 0             | 0            | 0            | 1             |
| GSM308285  | GSE12276 | EMC192 | chemo30          | Basal   | 7   | 1           | 0             | 0            | 0            | 1             |
| GSM308295  | GSE12276 | EMC192 | chemo40          | Basal   | 11  | 1           | 0             | 1            | 0            | 0             |
| GSM308301  | GSE12276 | EMC192 | chemo46          | Basal   | 15  | 0           | 0             | 0            | 0            | 0             |
| GSM308307  | GSE12276 | EMC192 | chemo52          | Basal   | 29  | 1           | 1             | 1            | 0            | 1             |
| GSM308309  | GSE12276 | EMC192 | chemo54          | Basal   | 20  | 1           | 0             | 0            | 1            | 0             |
| GSM308311  | GSE12276 | EMC192 | chemo56          | Basal   | 36  | 1           | 0             | 0            | 1            | 0             |
| GSM308312  | GSE12276 | EMC192 | chemo57          | Basal   | 115 | 0           | 0             | 0            | 0            | 0             |
| GSM308319  | GSE12276 | EMC192 | chemo63          | Basal   | 15  | 1           | 0             | 1            | 1            | 0             |
| GSM308324  | GSE12276 | EMC192 | chemo68          | Basal   | 14  | 1           | 0             | 1            | 1            | 0             |
| GSM308328  | GSE12276 | EMC192 | chemo72          | Basal   | 16  | 1           | 0             | 1            | 0            | 0             |
| GSM308329  | GSE12276 | EMC192 | chemo73          | Basal   | 1   | 0           | 0             | 0            | 0            | 0             |
| GSM308330  | GSE12276 | EMC192 | chemo74          | Basal   | 0   | 1           | 0             | 0            | 1            | 0             |
| GSM308333  | GSE12276 | EMC192 | chemo77          | Basal   | 18  | 1           | 0             | 1            | 0            | 0             |
| GSM308335  | GSE12276 | EMC192 | chemo79          | Basal   | 50  | 1           | 0             | 0            | 0            | 0             |
| GSM308336  | GSE12276 | EMC192 | chemo80          | Basal   | 8   | 1           | 0             | 0            | 0            | 1             |
| GSM308338  | GSE12276 | EMC192 | chemo82          | Basal   | 10  | 1           | 0             | 1            | 0            | 0             |
| GSM308339  | GSE12276 | EMC192 | chemo83          | Basal   | 3   | 1           | 0             | 1            | 0            | 0             |
| GSM308348  | GSE12276 | EMC192 | chemo92          | Basal   | 25  | 1           | 0             | 0            | 1            | 0             |
| GSM308354  | GSE12276 | EMC192 | chemo98          | Basal   | 21  | 1           | 0             | 0            | 1            | 0             |
| GSM308356  | GSE12276 | EMC192 | chemo100         | Basal   | 18  | 1           | 0             | 1            | 0            | 0             |
| GSM308357  | GSE12276 | EMC192 | chemo101         | Basal   | 16  | 0           | 0             | 0            | 0            | 0             |
| GSM308365  | GSE12276 | EMC192 | chemo109         | Basal   | 11  | 1           | 0             | 0            | 0            | 0             |
| GSM308374  | GSE12276 | EMC192 | chemo118         | Basal   | 6   | 1           | 1             | 0            | 0            | 0             |
| GSM308376  | GSE12276 | EMC192 | chemo120         | Basal   | 6   | 1           | 0             | 0            | 0            | 0             |

|           |          |        |          |       |     |   |   |   |   |   |
|-----------|----------|--------|----------|-------|-----|---|---|---|---|---|
| GSM308377 | GSE12276 | EMC192 | chemo121 | Basal | 19  | 1 | 0 | 0 | 0 | 1 |
| GSM308378 | GSE12276 | EMC192 | chemo122 | Basal | 15  | 1 | 0 | 1 | 0 | 0 |
| GSM308391 | GSE12276 | EMC192 | chemo135 | Basal | 7   | 1 | 0 | 1 | 0 | 1 |
| GSM308393 | GSE12276 | EMC192 | chemo137 | Basal | 33  | 1 | 0 | 1 | 1 | 0 |
| GSM308394 | GSE12276 | EMC192 | chemo138 | Basal | 22  | 1 | 0 | 1 | 0 | 0 |
| GSM308398 | GSE12276 | EMC192 | chemo142 | Basal | 12  | 1 | 0 | 0 | 0 | 0 |
| GSM308404 | GSE12276 | EMC192 | chemo148 | Basal | 8   | 1 | 0 | 0 | 1 | 0 |
| GSM308407 | GSE12276 | EMC192 | chemo151 | Basal | 94  | 1 | 0 | 0 | 0 | 0 |
| GSM308408 | GSE12276 | EMC192 | chemo152 | Basal | 4   | 1 | 0 | 0 | 1 | 0 |
| GSM308443 | GSE12276 | EMC192 | BV31     | Basal | 14  | 1 | 0 | 0 | 0 | 0 |
| GSM36795  | GSE2034  | EMC286 | 855      | Basal | 88  | 0 | 0 | 0 | 0 | 0 |
| GSM36797  | GSE2034  | EMC286 | 6        | Basal | 9   | 1 | 0 | 1 | 1 | 0 |
| GSM36798  | GSE2034  | EMC286 | 7        | Basal | 106 | 0 | 0 | 0 | 0 | 0 |
| GSM36808  | GSE2034  | EMC286 | 292      | Basal | 58  | 0 | 0 | 0 | 0 | 0 |
| GSM36817  | GSE2034  | EMC286 | 627      | Basal | 113 | 0 | 0 | 0 | 0 | 0 |
| GSM36822  | GSE2034  | EMC286 | 710      | Basal | 50  | 0 | 0 | 0 | 0 | 0 |
| GSM36823  | GSE2034  | EMC286 | 630      | Basal | 119 | 0 | 0 | 0 | 0 | 0 |
| GSM36824  | GSE2034  | EMC286 | 712      | Basal | 86  | 0 | 0 | 0 | 0 | 0 |
| GSM36828  | GSE2034  | EMC286 | 633      | Basal | 76  | 0 | 0 | 0 | 0 | 0 |
| GSM36833  | GSE2034  | EMC286 | 637      | Basal | 54  | 0 | 0 | 0 | 0 | 0 |
| GSM36835  | GSE2034  | EMC286 | 14       | Basal | 14  | 1 | 0 | 1 | 0 | 0 |
| GSM36846  | GSE2034  | EMC286 | 805      | Basal | 103 | 0 | 0 | 0 | 0 | 0 |
| GSM36847  | GSE2034  | EMC286 | 806      | Basal | 85  | 0 | 0 | 0 | 0 | 0 |
| GSM36862  | GSE2034  | EMC286 | 29       | Basal | 25  | 1 | 0 | 0 | 1 | 0 |
| GSM36875  | GSE2034  | EMC286 | 37       | Basal | 7   | 1 | 1 | 0 | 0 | 0 |
| GSM36876  | GSE2034  | EMC286 | 38       | Basal | 133 | 0 | 0 | 0 | 0 | 0 |
| GSM36879  | GSE2034  | EMC286 | 100      | Basal | 39  | 1 | 0 | 0 | 1 | 1 |
| GSM36890  | GSE2034  | EMC286 | 820      | Basal | 116 | 0 | 0 | 0 | 0 | 0 |
| GSM36891  | GSE2034  | EMC286 | 109      | Basal | 87  | 0 | 0 | 0 | 0 | 0 |
| GSM36900  | GSE2034  | EMC286 | 46       | Basal | 109 | 0 | 0 | 0 | 0 | 0 |
| GSM36901  | GSE2034  | EMC286 | 48       | Basal | 101 | 0 | 0 | 0 | 0 | 0 |
| GSM36923  | GSE2034  | EMC286 | 121      | Basal | 23  | 1 | 0 | 1 | 0 | 0 |
| GSM36927  | GSE2034  | EMC286 | 124      | Basal | 8   | 1 | 0 | 1 | 0 | 0 |
| GSM36931  | GSE2034  | EMC286 | 126      | Basal | 37  | 1 | 1 | 1 | 0 | 0 |
| GSM36935  | GSE2034  | EMC286 | 844      | Basal | 114 | 0 | 0 | 0 | 0 | 0 |
| GSM36937  | GSE2034  | EMC286 | 61       | Basal | 11  | 1 | 0 | 1 | 1 | 0 |

|          |         |        |        |       |      |   |   |   |   |    |
|----------|---------|--------|--------|-------|------|---|---|---|---|----|
| GSM36939 | GSE2034 | EMC286 | 63     | Basal | 14   | 1 | 0 | 0 | 1 | 0  |
| GSM36940 | GSE2034 | EMC286 | 64     | Basal | 134  | 0 | 0 | 0 | 0 | 0  |
| GSM36941 | GSE2034 | EMC286 | 65     | Basal | 9    | 0 | 0 | 0 | 0 | 0  |
| GSM36949 | GSE2034 | EMC286 | 215    | Basal | 6    | 1 | 0 | 0 | 1 | 0  |
| GSM36953 | GSE2034 | EMC286 | 135    | Basal | 84   | 0 | 0 | 0 | 0 | 0  |
| GSM36960 | GSE2034 | EMC286 | 696    | Basal | 51   | 1 | 1 | 0 | 0 | 0  |
| GSM36966 | GSE2034 | EMC286 | 74     | Basal | 90   | 0 | 0 | 0 | 0 | 0  |
| GSM36969 | GSE2034 | EMC286 | 79     | Basal | 32   | 1 | 0 | 1 | 0 | 0  |
| GSM36977 | GSE2034 | EMC286 | 780    | Basal | 124  | 0 | 0 | 0 | 0 | 0  |
| GSM36981 | GSE2034 | EMC286 | 864    | Basal | 87   | 0 | 0 | 0 | 0 | 0  |
| GSM36991 | GSE2034 | EMC286 | 84     | Basal | 114  | 0 | 0 | 0 | 0 | 0  |
| GSM37002 | GSE2034 | EMC286 | 236    | Basal | 16   | 1 | 1 | 0 | 0 | 1  |
| GSM37017 | GSE2034 | EMC286 | 90     | Basal | 108  | 0 | 0 | 0 | 0 | 0  |
| GSM37021 | GSE2034 | EMC286 | 94     | Basal | 109  | 0 | 0 | 0 | 0 | 0  |
| GSM37022 | GSE2034 | EMC286 | 96     | Basal | 30   | 1 | 0 | 0 | 0 | 1  |
| GSM37027 | GSE2034 | EMC286 | 241    | Basal | 17   | 1 | 0 | 1 | 0 | 0  |
| GSM37045 | GSE2034 | EMC286 | 894    | Basal | 123  | 0 | 0 | 0 | 0 | 0  |
| GSM37047 | GSE2034 | EMC286 | 772    | Basal | 108  | 0 | 0 | 0 | 0 | 0  |
| GSM37053 | GSE2034 | EMC286 | 264    | Basal | 33   | 1 | 0 | 0 | 1 | 0  |
| GSM50035 | GSE2603 | MSK82  | B114.T | Basal | 22.1 | 1 | 0 | 1 | 0 | NA |
| GSM50040 | GSE2603 | MSK82  | B57.T  | Basal | 90.8 | 0 | 0 | 0 | 0 | NA |
| GSM50042 | GSE2603 | MSK82  | B61.T  | Basal | 52.9 | 0 | 0 | 0 | 0 | NA |
| GSM50046 | GSE2603 | MSK82  | B67.T  | Basal | 96.5 | 0 | 0 | 0 | 0 | NA |
| GSM50052 | GSE2603 | MSK82  | B75.T  | Basal | 54.7 | 0 | 0 | 0 | 0 | NA |
| GSM50067 | GSE2603 | MSK82  | B50.T  | Basal | 9.2  | 1 | 0 | 1 | 0 | NA |
| GSM50078 | GSE2603 | MSK82  | B112.T | Basal | 83.8 | 0 | 0 | 0 | 0 | NA |
| GSM50079 | GSE2603 | MSK82  | B115.T | Basal | 78.2 | 0 | 0 | 0 | 0 | NA |
| GSM50093 | GSE2603 | MSK82  | B97.T  | Basal | 94.3 | 0 | 0 | 0 | 0 | NA |
| GSM50094 | GSE2603 | MSK82  | B103.T | Basal | 38.6 | 1 | 1 | 1 | 1 | NA |
| GSM50102 | GSE2603 | MSK82  | B94.T  | Basal | 8    | 0 | 0 | 0 | 0 | NA |
| GSM50103 | GSE2603 | MSK82  | B95.T  | Basal | 22.1 | 1 | 0 | 1 | 0 | NA |
| GSM50107 | GSE2603 | MSK82  | B10.T  | Basal | 74.5 | 0 | 0 | 0 | 0 | NA |
| GSM50110 | GSE2603 | MSK82  | B13.T  | Basal | 62.3 | 0 | 0 | 0 | 0 | NA |
| GSM50112 | GSE2603 | MSK82  | B15.T  | Basal | 14.2 | 1 | 0 | 1 | 1 | NA |
| GSM50119 | GSE2603 | MSK82  | B26.T  | Basal | 50.2 | 0 | 0 | 0 | 0 | NA |
| GSM50123 | GSE2603 | MSK82  | B2.T   | Basal | 46.8 | 0 | 0 | 0 | 0 | NA |

|                       |        |        |     |       |       |   |   |   |   |   |
|-----------------------|--------|--------|-----|-------|-------|---|---|---|---|---|
| PNAS 103 + Nature 103 | NKI295 | NKI295 | 103 | Basal | 59.4  | 1 | 0 | 0 | 0 | 1 |
| PNAS 131              | NKI295 | NKI295 | 131 | Basal | 56    | 0 | 0 | 0 | 0 | 0 |
| PNAS 134              | NKI295 | NKI295 | 134 | Basal | 83.9  | 0 | 0 | 0 | 0 | 0 |
| PNAS 135              | NKI295 | NKI295 | 135 | Basal | 112   | 0 | 0 | 0 | 0 | 0 |
| PNAS 144              | NKI295 | NKI295 | 144 | Basal | 169.5 | 0 | 0 | 0 | 0 | 0 |
| PNAS 175              | NKI295 | NKI295 | 175 | Basal | 91.1  | 1 | 1 | 0 | 1 | 1 |
| PNAS 179              | NKI295 | NKI295 | 179 | Basal | 153.2 | 0 | 0 | 0 | 0 | 0 |
| PNAS 189              | NKI295 | NKI295 | 189 | Basal | 144.9 | 0 | 0 | 0 | 0 | 0 |
| PNAS 195              | NKI295 | NKI295 | 195 | Basal | 138.5 | 0 | 0 | 0 | 0 | 0 |
| PNAS 199              | NKI295 | NKI295 | 199 | Basal | 130.9 | 0 | 0 | 0 | 0 | 0 |
| PNAS 202              | NKI295 | NKI295 | 202 | Basal | 40.5  | 1 | 1 | 0 | 0 | 1 |
| PNAS 215              | NKI295 | NKI295 | 215 | Basal | 124.2 | 0 | 0 | 0 | 0 | 0 |
| PNAS 222 + Nature 112 | NKI295 | NKI295 | 222 | Basal | 27    | 0 | 0 | 0 | 0 | 0 |
| PNAS 226 + Nature 81  | NKI295 | NKI295 | 226 | Basal | 105.5 | 0 | 0 | 0 | 0 | 0 |
| PNAS 228 + Nature 50  | NKI295 | NKI295 | 228 | Basal | 14.7  | 1 | 1 | 0 | 1 | 1 |
| PNAS 230 + Nature 53  | NKI295 | NKI295 | 230 | Basal | 3.3   | 1 | 0 | 0 | 0 | 1 |
| PNAS 238 + Nature 65  | NKI295 | NKI295 | 238 | Basal | 22.1  | 0 | 0 | 0 | 0 | 0 |
| PNAS 241 + Nature 67  | NKI295 | NKI295 | 241 | Basal | 24    | 1 | 0 | 1 | 0 | 0 |
| PNAS 245              | NKI295 | NKI295 | 245 | Basal | 138.5 | 0 | 0 | 0 | 0 | 0 |
| PNAS 263              | NKI295 | NKI295 | 263 | Basal | 26.7  | 1 | 0 | 1 | 1 | 0 |
| PNAS 265              | NKI295 | NKI295 | 265 | Basal | 81.5  | 0 | 0 | 0 | 0 | 0 |
| PNAS 267              | NKI295 | NKI295 | 267 | Basal | 83.2  | 0 | 0 | 0 | 0 | 0 |
| PNAS 268              | NKI295 | NKI295 | 268 | Basal | 85.1  | 0 | 0 | 0 | 0 | 0 |
| PNAS 269              | NKI295 | NKI295 | 269 | Basal | 11.2  | 1 | 0 | 0 | 0 | 1 |
| PNAS 307              | NKI295 | NKI295 | 307 | Basal | 23.6  | 1 | 0 | 1 | 1 | 0 |
| PNAS 310              | NKI295 | NKI295 | 310 | Basal | 109.2 | 0 | 0 | 0 | 0 | 0 |
| PNAS 324              | NKI295 | NKI295 | 324 | Basal | 106.3 | 0 | 0 | 0 | 0 | 0 |
| PNAS 326              | NKI295 | NKI295 | 326 | Basal | 99.6  | 0 | 0 | 0 | 0 | 0 |
| PNAS 332              | NKI295 | NKI295 | 332 | Basal | 95.9  | 0 | 0 | 0 | 0 | 0 |
| PNAS 335              | NKI295 | NKI295 | 335 | Basal | 89.7  | 0 | 0 | 0 | 0 | 0 |
| PNAS 377              | NKI295 | NKI295 | 377 | Basal | 102.3 | 1 | 0 | 1 | 0 | 0 |
| PNAS 398 + Nature 20  | NKI295 | NKI295 | 398 | Basal | 101.1 | 0 | 0 | 0 | 0 | 0 |
| PNAS 402              | NKI295 | NKI295 | 402 | Basal | 88.5  | 0 | 0 | 0 | 0 | 0 |
| PNAS 48 + Nature 48   | NKI295 | NKI295 | 48  | Basal | 12.3  | 1 | 1 | 1 | 0 | 1 |
| PNAS 56 + Nature 56   | NKI295 | NKI295 | 56  | Basal | 56.3  | 1 | 0 | 0 | 1 | 0 |
| PNAS 57 + Nature 57   | NKI295 | NKI295 | 57  | Basal | 27.6  | 1 | 0 | 1 | 0 | 0 |



|                     |          |        |          |         |       |   |   |   |   |   |
|---------------------|----------|--------|----------|---------|-------|---|---|---|---|---|
| PNAS 71 + Nature 71 | NKI295   | NKI295 | 71       | Basal   | 23.8  | 1 | 0 | 0 | 0 | 1 |
| PNAS 8 + Nature 8   | NKI295   | NKI295 | 8        | Basal   | 105.6 | 0 | 0 | 0 | 0 | 0 |
| GSM308271           | GSE12276 | EMC192 | chemo16  | Claudin | 29    | 0 | 0 | 0 | 0 | 0 |
| GSM308274           | GSE12276 | EMC192 | chemo19  | Claudin | 29    | 0 | 0 | 0 | 0 | 0 |
| GSM308280           | GSE12276 | EMC192 | chemo25  | Claudin | 16    | 1 | 1 | 0 | 0 | 0 |
| GSM308291           | GSE12276 | EMC192 | chemo36  | Claudin | 25    | 1 | 1 | 1 | 0 | 0 |
| GSM308302           | GSE12276 | EMC192 | chemo47  | Claudin | 24    | 1 | 0 | 1 | 0 | 0 |
| GSM308313           | GSE12276 | EMC192 | chemo58  | Claudin | 4     | 1 | 0 | 1 | 0 | 0 |
| GSM308314           | GSE12276 | EMC192 | chemo59  | Claudin | 8     | 1 | 0 | 1 | 0 | 0 |
| GSM308334           | GSE12276 | EMC192 | chemo78  | Claudin | 23    | 0 | 0 | 0 | 0 | 0 |
| GSM308341           | GSE12276 | EMC192 | chemo85  | Claudin | 17    | 0 | 0 | 0 | 0 | 0 |
| GSM308346           | GSE12276 | EMC192 | chemo90  | Claudin | 13    | 1 | 0 | 1 | 0 | 0 |
| GSM308350           | GSE12276 | EMC192 | chemo94  | Claudin | 15    | 1 | 0 | 0 | 1 | 0 |
| GSM308352           | GSE12276 | EMC192 | chemo96  | Claudin | 0     | 1 | 0 | 0 | 1 | 1 |
| GSM308364           | GSE12276 | EMC192 | chemo108 | Claudin | 29    | 1 | 0 | 0 | 1 | 0 |
| GSM308366           | GSE12276 | EMC192 | chemo110 | Claudin | 58    | 1 | 1 | 0 | 0 | 0 |
| GSM308380           | GSE12276 | EMC192 | chemo124 | Claudin | 7     | 0 | 0 | 0 | 0 | 0 |
| GSM308381           | GSE12276 | EMC192 | chemo125 | Claudin | 115   | 1 | 0 | 0 | 0 | 1 |
| GSM308385           | GSE12276 | EMC192 | chemo129 | Claudin | 27    | 1 | 0 | 0 | 1 | 0 |
| GSM308387           | GSE12276 | EMC192 | chemo131 | Claudin | 4     | 1 | 0 | 0 | 0 | 0 |
| GSM308388           | GSE12276 | EMC192 | chemo132 | Claudin | 17    | 0 | 0 | 0 | 0 | 0 |
| GSM308415           | GSE12276 | EMC192 | BV3      | Claudin | 50    | 1 | 0 | 0 | 1 | 0 |
| GSM308430           | GSE12276 | EMC192 | BV18     | Claudin | 55    | 1 | 0 | 1 | 0 | 0 |
| GSM308449           | GSE12276 | EMC192 | BV37     | Claudin | 47    | 1 | 0 | 1 | 0 | 0 |
| GSM308460           | GSE12276 | EMC192 | BV48     | Claudin | 107   | 1 | 0 | 0 | 1 | 1 |
| GSM36788            | GSE2034  | EMC286 | 609      | Claudin | 79    | 0 | 0 | 0 | 0 | 0 |
| GSM36794            | GSE2034  | EMC286 | 791      | Claudin | 87    | 0 | 0 | 0 | 0 | 0 |
| GSM36809            | GSE2034  | EMC286 | 293      | Claudin | 56    | 0 | 0 | 0 | 0 | 0 |
| GSM36811            | GSE2034  | EMC286 | 620      | Claudin | 62    | 1 | 0 | 0 | 1 | 0 |
| GSM36816            | GSE2034  | EMC286 | 707      | Claudin | 98    | 0 | 0 | 0 | 0 | 0 |
| GSM36818            | GSE2034  | EMC286 | 546      | Claudin | 62    | 1 | 0 | 1 | 0 | 0 |
| GSM36826            | GSE2034  | EMC286 | 550      | Claudin | 58    | 0 | 0 | 0 | 0 | 0 |
| GSM36827            | GSE2034  | EMC286 | 713      | Claudin | 156   | 0 | 0 | 0 | 0 | 0 |
| GSM36854            | GSE2034  | EMC286 | 647      | Claudin | 105   | 0 | 0 | 0 | 0 | 0 |
| GSM36855            | GSE2034  | EMC286 | 20       | Claudin | 128   | 0 | 0 | 0 | 0 | 0 |
| GSM36865            | GSE2034  | EMC286 | 813      | Claudin | 103   | 0 | 0 | 0 | 0 | 0 |

|                     |         |        |        |         |       |   |   |   |   |    |
|---------------------|---------|--------|--------|---------|-------|---|---|---|---|----|
| GSM36886            | GSE2034 | EMC286 | 107    | Claudin | 94    | 0 | 0 | 0 | 0 | 0  |
| GSM36889            | GSE2034 | EMC286 | 901    | Claudin | 108   | 0 | 0 | 0 | 0 | 0  |
| GSM36902            | GSE2034 | EMC286 | 49     | Claudin | 28    | 1 | 1 | 0 | 0 | 0  |
| GSM36903            | GSE2034 | EMC286 | 110    | Claudin | 8     | 1 | 0 | 0 | 1 | 0  |
| GSM36905            | GSE2034 | EMC286 | 112    | Claudin | 17    | 1 | 0 | 0 | 0 | 1  |
| GSM36909            | GSE2034 | EMC286 | 118    | Claudin | 95    | 0 | 0 | 0 | 0 | 0  |
| GSM36912            | GSE2034 | EMC286 | 833    | Claudin | 97    | 0 | 0 | 0 | 0 | 0  |
| GSM36918            | GSE2034 | EMC286 | 55     | Claudin | 11    | 1 | 0 | 0 | 1 | 0  |
| GSM36932            | GSE2034 | EMC286 | 841    | Claudin | 96    | 0 | 0 | 0 | 0 | 0  |
| GSM36936            | GSE2034 | EMC286 | 845    | Claudin | 109   | 0 | 0 | 0 | 0 | 0  |
| GSM36944            | GSE2034 | EMC286 | 68     | Claudin | 112   | 0 | 0 | 0 | 0 | 0  |
| GSM36952            | GSE2034 | EMC286 | 216    | Claudin | 13    | 0 | 0 | 0 | 0 | 0  |
| GSM36959            | GSE2034 | EMC286 | 774    | Claudin | 120   | 0 | 0 | 0 | 0 | 0  |
| GSM37000            | GSE2034 | EMC286 | 779    | Claudin | 137   | 0 | 0 | 0 | 0 | 0  |
| GSM37009            | GSE2034 | EMC286 | 793    | Claudin | 122   | 0 | 0 | 0 | 0 | 0  |
| GSM37040            | GSE2034 | EMC286 | 255    | Claudin | 6     | 1 | 1 | 1 | 0 | 1  |
| GSM37043            | GSE2034 | EMC286 | 890    | Claudin | 161   | 0 | 0 | 0 | 0 | 0  |
| GSM37050            | GSE2034 | EMC286 | 261    | Claudin | 18    | 0 | 0 | 0 | 0 | 0  |
| GSM37051            | GSE2034 | EMC286 | 262    | Claudin | 18    | 1 | 0 | 1 | 0 | 0  |
| GSM37052            | GSE2034 | EMC286 | 263    | Claudin | 32    | 0 | 0 | 0 | 0 | 0  |
| GSM37058            | GSE2034 | EMC286 | 271    | Claudin | 64    | 1 | 0 | 0 | 1 | 0  |
| GSM50045            | GSE2603 | MSK82  | B66.T  | Claudin | 129   | 0 | 0 | 0 | 0 | NA |
| GSM50048            | GSE2603 | MSK82  | B69.T  | Claudin | 72.8  | 0 | 0 | 0 | 0 | NA |
| GSM50054            | GSE2603 | MSK82  | B77.T  | Claudin | 48.6  | 0 | 0 | 0 | 0 | NA |
| GSM50061            | GSE2603 | MSK82  | B44.T  | Claudin | 47.5  | 1 | 1 | 1 | 1 | NA |
| GSM50063            | GSE2603 | MSK82  | B46.T  | Claudin | 37.3  | 1 | 0 | 1 | 0 | NA |
| GSM50066            | GSE2603 | MSK82  | B49.T  | Claudin | 14.9  | 1 | 0 | 1 | 1 | NA |
| GSM50073            | GSE2603 | MSK82  | B102.T | Claudin | 87    | 0 | 0 | 0 | 0 | NA |
| GSM50075            | GSE2603 | MSK82  | B105.T | Claudin | 87.8  | 0 | 0 | 0 | 0 | NA |
| GSM50096            | GSE2603 | MSK82  | B109.T | Claudin | 16.6  | 1 | 0 | 1 | 0 | NA |
| GSM50106            | GSE2603 | MSK82  | B7.T   | Claudin | 19    | 1 | 0 | 1 | 0 | NA |
| PNAS 12 + Nature 12 | NKI295  | NKI295 | 12     | Claudin | 94.3  | 0 | 0 | 0 | 0 | 0  |
| PNAS 164            | NKI295  | NKI295 | 164    | Claudin | 68    | 0 | 0 | 0 | 0 | 0  |
| PNAS 182            | NKI295  | NKI295 | 182    | Claudin | 135.8 | 0 | 0 | 0 | 0 | 0  |
| PNAS 184            | NKI295  | NKI295 | 184    | Claudin | 14.5  | 1 | 0 | 1 | 0 | 0  |
| PNAS 186            | NKI295  | NKI295 | 186    | Claudin | 140.9 | 0 | 0 | 0 | 0 | 0  |

|                      |          |        |         |         |       |   |   |   |   |   |
|----------------------|----------|--------|---------|---------|-------|---|---|---|---|---|
| PNAS 194             | NKI295   | NKI295 | 194     | Claudin | 149.6 | 0 | 0 | 0 | 0 | 0 |
| PNAS 197             | NKI295   | NKI295 | 197     | Claudin | 132.6 | 0 | 0 | 0 | 0 | 0 |
| PNAS 212             | NKI295   | NKI295 | 212     | Claudin | 145.7 | 0 | 0 | 0 | 0 | 0 |
| PNAS 219             | NKI295   | NKI295 | 219     | Claudin | 118   | 0 | 0 | 0 | 0 | 0 |
| PNAS 237 + Nature 68 | NKI295   | NKI295 | 237     | Claudin | 13.8  | 1 | 0 | 0 | 0 | 1 |
| PNAS 248 + Nature 87 | NKI295   | NKI295 | 248     | Claudin | 59.2  | 0 | 0 | 0 | 0 | 0 |
| PNAS 270             | NKI295   | NKI295 | 270     | Claudin | 35.5  | 0 | 0 | 0 | 0 | 0 |
| PNAS 276             | NKI295   | NKI295 | 276     | Claudin | 7.8   | 1 | 1 | 0 | 0 | 0 |
| PNAS 284             | NKI295   | NKI295 | 284     | Claudin | 47    | 1 | 0 | 0 | 1 | 1 |
| PNAS 291             | NKI295   | NKI295 | 291     | Claudin | 139.8 | 0 | 0 | 0 | 0 | 0 |
| PNAS 304             | NKI295   | NKI295 | 304     | Claudin | 80.5  | 1 | 0 | 0 | 1 | 1 |
| PNAS 321             | NKI295   | NKI295 | 321     | Claudin | 18    | 0 | 0 | 0 | 0 | 0 |
| PNAS 330             | NKI295   | NKI295 | 330     | Claudin | 62.4  | 0 | 0 | 0 | 0 | 0 |
| PNAS 338             | NKI295   | NKI295 | 338     | Claudin | 76.1  | 0 | 0 | 0 | 0 | 0 |
| PNAS 344             | NKI295   | NKI295 | 344     | Claudin | 82.5  | 0 | 0 | 0 | 0 | 0 |
| PNAS 347             | NKI295   | NKI295 | 347     | Claudin | 56.6  | 0 | 0 | 0 | 0 | 0 |
| PNAS 350             | NKI295   | NKI295 | 350     | Claudin | 39.4  | 0 | 0 | 0 | 0 | 0 |
| PNAS 36 + Nature 36  | NKI295   | NKI295 | 36      | Claudin | 121.3 | 0 | 0 | 0 | 0 | 0 |
| PNAS 73 + Nature 73  | NKI295   | NKI295 | 73      | Claudin | 25.8  | 1 | 0 | 1 | 1 | 1 |
| PNAS 75 + Nature 75  | NKI295   | NKI295 | 75      | Claudin | 26.5  | 1 | 1 | 1 | 0 | 0 |
| GSM308256            | GSE12276 | EMC192 | chemo1  | Her2    | 3     | 1 | 0 | 0 | 1 | 1 |
| GSM308259            | GSE12276 | EMC192 | chemo4  | Her2    | 13    | 1 | 0 | 0 | 1 | 0 |
| GSM308265            | GSE12276 | EMC192 | chemo10 | Her2    | 23    | 1 | 0 | 0 | 1 | 1 |
| GSM308266            | GSE12276 | EMC192 | chemo11 | Her2    | 3     | 1 | 0 | 0 | 1 | 1 |
| GSM308267            | GSE12276 | EMC192 | chemo12 | Her2    | 17    | 1 | 0 | 0 | 1 | 1 |
| GSM308269            | GSE12276 | EMC192 | chemo14 | Her2    | 8     | 1 | 0 | 1 | 0 | 0 |
| GSM308272            | GSE12276 | EMC192 | chemo17 | Her2    | 14    | 1 | 0 | 0 | 1 | 0 |
| GSM308276            | GSE12276 | EMC192 | chemo21 | Her2    | 16    | 1 | 0 | 1 | 1 | 0 |
| GSM308278            | GSE12276 | EMC192 | chemo23 | Her2    | 20    | 1 | 0 | 0 | 0 | 1 |
| GSM308279            | GSE12276 | EMC192 | chemo24 | Her2    | 20    | 1 | 0 | 1 | 1 | 1 |
| GSM308282            | GSE12276 | EMC192 | chemo27 | Her2    | 10    | 1 | 0 | 0 | 1 | 0 |
| GSM308286            | GSE12276 | EMC192 | chemo31 | Her2    | 11    | 1 | 0 | 1 | 0 | 1 |
| GSM308290            | GSE12276 | EMC192 | chemo35 | Her2    | 6     | 1 | 0 | 0 | 1 | 1 |
| GSM308303            | GSE12276 | EMC192 | chemo48 | Her2    | 39    | 1 | 1 | 0 | 0 | 0 |
| GSM308305            | GSE12276 | EMC192 | chemo50 | Her2    | 15    | 1 | 0 | 0 | 1 | 1 |
| GSM308306            | GSE12276 | EMC192 | chemo51 | Her2    | 28    | 1 | 0 | 1 | 0 | 1 |

|           |          |        |          |      |     |   |   |   |   |   |
|-----------|----------|--------|----------|------|-----|---|---|---|---|---|
| GSM308308 | GSE12276 | EMC192 | chemo53  | Her2 | 23  | 1 | 0 | 0 | 1 | 0 |
| GSM308320 | GSE12276 | EMC192 | chemo64  | Her2 | 7   | 1 | 0 | 0 | 0 | 1 |
| GSM308323 | GSE12276 | EMC192 | chemo67  | Her2 | 18  | 1 | 0 | 1 | 1 | 1 |
| GSM308326 | GSE12276 | EMC192 | chemo70  | Her2 | 19  | 1 | 1 | 0 | 0 | 0 |
| GSM308342 | GSE12276 | EMC192 | chemo86  | Her2 | 23  | 1 | 0 | 0 | 0 | 0 |
| GSM308343 | GSE12276 | EMC192 | chemo87  | Her2 | 12  | 1 | 0 | 0 | 1 | 0 |
| GSM308344 | GSE12276 | EMC192 | chemo88  | Her2 | 6   | 1 | 0 | 0 | 1 | 0 |
| GSM308349 | GSE12276 | EMC192 | chemo93  | Her2 | 4   | 1 | 0 | 0 | 1 | 1 |
| GSM308355 | GSE12276 | EMC192 | chemo99  | Her2 | 0   | 1 | 0 | 0 | 0 | 1 |
| GSM308362 | GSE12276 | EMC192 | chemo106 | Her2 | 15  | 1 | 0 | 0 | 1 | 1 |
| GSM308370 | GSE12276 | EMC192 | chemo114 | Her2 | 12  | 1 | 1 | 0 | 0 | 0 |
| GSM308386 | GSE12276 | EMC192 | chemo130 | Her2 | 5   | 1 | 0 | 0 | 0 | 1 |
| GSM308389 | GSE12276 | EMC192 | chemo133 | Her2 | 15  | 1 | 0 | 0 | 1 | 1 |
| GSM308401 | GSE12276 | EMC192 | chemo145 | Her2 | 13  | 1 | 0 | 0 | 1 | 1 |
| GSM308419 | GSE12276 | EMC192 | BV7      | Her2 | 22  | 1 | 0 | 0 | 1 | 0 |
| GSM308440 | GSE12276 | EMC192 | BV28     | Her2 | 5   | 1 | 0 | 0 | 0 | 1 |
| GSM36778  | GSE2034  | EMC286 | 278      | Her2 | 50  | 1 | 0 | 1 | 0 | 0 |
| GSM36780  | GSE2034  | EMC286 | 846      | Her2 | 84  | 0 | 0 | 0 | 0 | 0 |
| GSM36781  | GSE2034  | EMC286 | 765      | Her2 | 147 | 0 | 0 | 0 | 0 | 0 |
| GSM36799  | GSE2034  | EMC286 | 611      | Her2 | 75  | 0 | 0 | 0 | 0 | 0 |
| GSM36802  | GSE2034  | EMC286 | 612      | Her2 | 92  | 0 | 0 | 0 | 0 | 0 |
| GSM36805  | GSE2034  | EMC286 | 290      | Her2 | 100 | 0 | 0 | 0 | 0 | 0 |
| GSM36814  | GSE2034  | EMC286 | 703      | Her2 | 61  | 1 | 0 | 0 | 1 | 1 |
| GSM36821  | GSE2034  | EMC286 | 856      | Her2 | 88  | 0 | 0 | 0 | 0 | 0 |
| GSM36834  | GSE2034  | EMC286 | 11       | Her2 | 109 | 0 | 0 | 0 | 0 | 0 |
| GSM36837  | GSE2034  | EMC286 | 17       | Her2 | 137 | 0 | 0 | 0 | 0 | 0 |
| GSM36838  | GSE2034  | EMC286 | 18       | Her2 | 34  | 1 | 0 | 1 | 1 | 0 |
| GSM36851  | GSE2034  | EMC286 | 646      | Her2 | 100 | 0 | 0 | 0 | 0 | 0 |
| GSM36858  | GSE2034  | EMC286 | 21       | Her2 | 14  | 1 | 0 | 0 | 1 | 1 |
| GSM36860  | GSE2034  | EMC286 | 27       | Her2 | 30  | 1 | 0 | 0 | 1 | 0 |
| GSM36863  | GSE2034  | EMC286 | 857      | Her2 | 98  | 0 | 0 | 0 | 0 | 0 |
| GSM36870  | GSE2034  | EMC286 | 31       | Her2 | 30  | 1 | 0 | 0 | 1 | 0 |
| GSM36872  | GSE2034  | EMC286 | 33       | Her2 | 7   | 1 | 0 | 0 | 0 | 1 |
| GSM36877  | GSE2034  | EMC286 | 39       | Her2 | 43  | 1 | 1 | 0 | 0 | 0 |
| GSM36884  | GSE2034  | EMC286 | 768      | Her2 | 129 | 0 | 0 | 0 | 0 | 0 |
| GSM36892  | GSE2034  | EMC286 | 903      | Her2 | 110 | 0 | 0 | 0 | 0 | 0 |

|          |         |        |        |      |      |   |   |   |   |    |
|----------|---------|--------|--------|------|------|---|---|---|---|----|
| GSM36893 | GSE2034 | EMC286 | 741    | Her2 | 124  | 0 | 0 | 0 | 0 | 0  |
| GSM36899 | GSE2034 | EMC286 | 44     | Her2 | 169  | 0 | 0 | 0 | 0 | 0  |
| GSM36904 | GSE2034 | EMC286 | 111    | Her2 | 98   | 0 | 0 | 0 | 0 | 0  |
| GSM36906 | GSE2034 | EMC286 | 113    | Her2 | 101  | 0 | 0 | 0 | 0 | 0  |
| GSM36920 | GSE2034 | EMC286 | 57     | Her2 | 20   | 1 | 0 | 0 | 0 | 1  |
| GSM36926 | GSE2034 | EMC286 | 204    | Her2 | 24   | 1 | 0 | 1 | 0 | 1  |
| GSM36929 | GSE2034 | EMC286 | 125    | Her2 | 93   | 0 | 0 | 0 | 0 | 0  |
| GSM36930 | GSE2034 | EMC286 | 769    | Her2 | 84   | 0 | 0 | 0 | 0 | 0  |
| GSM36933 | GSE2034 | EMC286 | 843    | Her2 | 110  | 0 | 0 | 0 | 0 | 0  |
| GSM36934 | GSE2034 | EMC286 | 763    | Her2 | 171  | 0 | 0 | 0 | 0 | 0  |
| GSM36938 | GSE2034 | EMC286 | 62     | Her2 | 108  | 0 | 0 | 0 | 0 | 0  |
| GSM36954 | GSE2034 | EMC286 | 217    | Her2 | 19   | 1 | 0 | 0 | 1 | 0  |
| GSM36955 | GSE2034 | EMC286 | 136    | Her2 | 25   | 1 | 0 | 0 | 1 | 0  |
| GSM36956 | GSE2034 | EMC286 | 137    | Her2 | 32   | 1 | 0 | 0 | 1 | 0  |
| GSM36961 | GSE2034 | EMC286 | 777    | Her2 | 153  | 0 | 0 | 0 | 0 | 0  |
| GSM36964 | GSE2034 | EMC286 | 71     | Her2 | 12   | 1 | 1 | 0 | 1 | 0  |
| GSM36967 | GSE2034 | EMC286 | 75     | Her2 | 15   | 1 | 0 | 0 | 1 | 0  |
| GSM36968 | GSE2034 | EMC286 | 78     | Her2 | 152  | 0 | 0 | 0 | 0 | 0  |
| GSM36972 | GSE2034 | EMC286 | 222    | Her2 | 37   | 1 | 0 | 0 | 1 | 0  |
| GSM36975 | GSE2034 | EMC286 | 787    | Her2 | 110  | 0 | 0 | 0 | 0 | 0  |
| GSM36992 | GSE2034 | EMC286 | 86     | Her2 | 104  | 0 | 0 | 0 | 0 | 0  |
| GSM36995 | GSE2034 | EMC286 | 852    | Her2 | 113  | 0 | 0 | 0 | 0 | 0  |
| GSM36996 | GSE2034 | EMC286 | 230    | Her2 | 24   | 1 | 0 | 0 | 1 | 0  |
| GSM37014 | GSE2034 | EMC286 | 796    | Her2 | 143  | 0 | 0 | 0 | 0 | 0  |
| GSM37016 | GSE2034 | EMC286 | 879    | Her2 | 108  | 0 | 0 | 0 | 0 | 0  |
| GSM37020 | GSE2034 | EMC286 | 93     | Her2 | 48   | 1 | 0 | 0 | 1 | 0  |
| GSM37023 | GSE2034 | EMC286 | 98     | Her2 | 14   | 1 | 0 | 0 | 1 | 0  |
| GSM37034 | GSE2034 | EMC286 | 853    | Her2 | 88   | 0 | 0 | 0 | 0 | 0  |
| GSM37036 | GSE2034 | EMC286 | 252    | Her2 | 15   | 1 | 0 | 0 | 1 | 0  |
| GSM37042 | GSE2034 | EMC286 | 259    | Her2 | 14   | 0 | 0 | 0 | 0 | 0  |
| GSM37044 | GSE2034 | EMC286 | 891    | Her2 | 112  | 0 | 0 | 0 | 0 | 0  |
| GSM37049 | GSE2034 | EMC286 | 260    | Her2 | 29   | 1 | 0 | 0 | 1 | 1  |
| GSM37054 | GSE2034 | EMC286 | 265    | Her2 | 66   | 0 | 0 | 0 | 0 | 0  |
| GSM37055 | GSE2034 | EMC286 | 267    | Her2 | 59   | 0 | 0 | 0 | 0 | 0  |
| GSM50034 | GSE2603 | MSK82  | B110.T | Her2 | 87   | 0 | 0 | 0 | 0 | NA |
| GSM50060 | GSE2603 | MSK82  | B43.T  | Her2 | 41.6 | 1 | 1 | 1 | 0 | NA |

|                       |         |        |        |      |       |   |   |   |   |    |
|-----------------------|---------|--------|--------|------|-------|---|---|---|---|----|
| GSM50065              | GSE2603 | MSK82  | B48.T  | Her2 | 69.7  | 0 | 0 | 0 | 0 | NA |
| GSM50070              | GSE2603 | MSK82  | B98.T  | Her2 | 40.3  | 1 | 0 | 0 | 1 | NA |
| GSM50071              | GSE2603 | MSK82  | B100.T | Her2 | 69.8  | 0 | 0 | 0 | 0 | NA |
| GSM50085              | GSE2603 | MSK82  | B84.T  | Her2 | 78    | 0 | 0 | 0 | 0 | NA |
| GSM50086              | GSE2603 | MSK82  | B85.T  | Her2 | 99.7  | 0 | 0 | 0 | 0 | NA |
| GSM50092              | GSE2603 | MSK82  | B93.T  | Her2 | 77.4  | 0 | 0 | 0 | 0 | NA |
| GSM50127              | GSE2603 | MSK82  | B3.T   | Her2 | 62.9  | 0 | 0 | 0 | 0 | NA |
| GSM50130              | GSE2603 | MSK82  | B6.T   | Her2 | 40.3  | 0 | 0 | 0 | 0 | NA |
| PNAS 109 + Nature 109 | NKI295  | NKI295 | 109    | Her2 | 38.3  | 1 | 0 | 1 | 0 | 1  |
| PNAS 11 + Nature 11   | NKI295  | NKI295 | 11     | Her2 | 69.7  | 0 | 0 | 0 | 0 | 0  |
| PNAS 13 + Nature 13   | NKI295  | NKI295 | 13     | Her2 | 98    | 0 | 0 | 0 | 0 | 0  |
| PNAS 130              | NKI295  | NKI295 | 130    | Her2 | 87.6  | 0 | 0 | 0 | 0 | 0  |
| PNAS 132              | NKI295  | NKI295 | 132    | Her2 | 80.6  | 0 | 0 | 0 | 0 | 0  |
| PNAS 136              | NKI295  | NKI295 | 136    | Her2 | 41.3  | 1 | 0 | 1 | 1 | 0  |
| PNAS 141 + Nature 64  | NKI295  | NKI295 | 141    | Her2 | 16.8  | 1 | 0 | 0 | 1 | 1  |
| PNAS 147              | NKI295  | NKI295 | 147    | Her2 | 19.3  | 0 | 0 | 0 | 0 | 0  |
| PNAS 149              | NKI295  | NKI295 | 149    | Her2 | 206.9 | 0 | 0 | 0 | 0 | 0  |
| PNAS 151              | NKI295  | NKI295 | 151    | Her2 | 168.1 | 1 | 0 | 0 | 0 | 0  |
| PNAS 153              | NKI295  | NKI295 | 153    | Her2 | 14.1  | 1 | 0 | 0 | 1 | 1  |
| PNAS 158              | NKI295  | NKI295 | 158    | Her2 | 33.7  | 1 | 0 | 1 | 1 | 1  |
| PNAS 172              | NKI295  | NKI295 | 172    | Her2 | 16.7  | 0 | 0 | 0 | 0 | 0  |
| PNAS 177              | NKI295  | NKI295 | 177    | Her2 | 107.1 | 1 | 0 | 0 | 0 | 0  |
| PNAS 180              | NKI295  | NKI295 | 180    | Her2 | 31.4  | 1 | 1 | 0 | 1 | 1  |
| PNAS 181              | NKI295  | NKI295 | 181    | Her2 | 141.6 | 0 | 0 | 0 | 0 | 0  |
| PNAS 208              | NKI295  | NKI295 | 208    | Her2 | 128.1 | 0 | 0 | 0 | 0 | 0  |
| PNAS 210              | NKI295  | NKI295 | 210    | Her2 | 134.4 | 0 | 0 | 0 | 0 | 0  |
| PNAS 213              | NKI295  | NKI295 | 213    | Her2 | 23.7  | 1 | 0 | 0 | 1 | 0  |
| PNAS 217              | NKI295  | NKI295 | 217    | Her2 | 20.6  | 1 | 1 | 1 | 1 | 1  |
| PNAS 229 + Nature 52  | NKI295  | NKI295 | 229    | Her2 | 19.4  | 1 | 0 | 0 | 0 | 1  |
| PNAS 236              | NKI295  | NKI295 | 236    | Her2 | 29.8  | 0 | 0 | 0 | 0 | 0  |
| PNAS 246              | NKI295  | NKI295 | 246    | Her2 | 137.4 | 0 | 0 | 0 | 0 | 0  |
| PNAS 249              | NKI295  | NKI295 | 249    | Her2 | 63.8  | 0 | 0 | 0 | 0 | 0  |
| PNAS 251 + Nature 16  | NKI295  | NKI295 | 251    | Her2 | 112.9 | 0 | 0 | 0 | 0 | 0  |
| PNAS 257              | NKI295  | NKI295 | 257    | Her2 | 27.6  | 0 | 0 | 0 | 0 | 0  |
| PNAS 258              | NKI295  | NKI295 | 258    | Her2 | 61.4  | 1 | 1 | 0 | 1 | 1  |
| PNAS 259              | NKI295  | NKI295 | 259    | Her2 | 66.2  | 1 | 0 | 0 | 0 | 0  |

|                      |          |        |         |      |       |   |   |   |   |   |
|----------------------|----------|--------|---------|------|-------|---|---|---|---|---|
| PNAS 266             | NKI295   | NKI295 | 266     | Her2 | 84.1  | 0 | 0 | 0 | 0 | 0 |
| PNAS 273             | NKI295   | NKI295 | 273     | Her2 | 84    | 0 | 0 | 0 | 0 | 0 |
| PNAS 286             | NKI295   | NKI295 | 286     | Her2 | 59.3  | 0 | 0 | 0 | 0 | 0 |
| PNAS 288             | NKI295   | NKI295 | 288     | Her2 | 4.2   | 1 | 0 | 0 | 1 | 0 |
| PNAS 296             | NKI295   | NKI295 | 296     | Her2 | 61    | 0 | 0 | 0 | 0 | 0 |
| PNAS 306             | NKI295   | NKI295 | 306     | Her2 | 122.4 | 0 | 0 | 0 | 0 | 0 |
| PNAS 308             | NKI295   | NKI295 | 308     | Her2 | 111.9 | 0 | 0 | 0 | 0 | 0 |
| PNAS 319             | NKI295   | NKI295 | 319     | Her2 | 76.5  | 1 | 0 | 1 | 1 | 0 |
| PNAS 325             | NKI295   | NKI295 | 325     | Her2 | 106.3 | 0 | 0 | 0 | 0 | 0 |
| PNAS 333             | NKI295   | NKI295 | 333     | Her2 | 101.9 | 0 | 0 | 0 | 0 | 0 |
| PNAS 341             | NKI295   | NKI295 | 341     | Her2 | 20.8  | 1 | 1 | 0 | 1 | 1 |
| PNAS 351             | NKI295   | NKI295 | 351     | Her2 | 78.3  | 0 | 0 | 0 | 0 | 0 |
| PNAS 367             | NKI295   | NKI295 | 367     | Her2 | 6.9   | 1 | 0 | 0 | 0 | 1 |
| PNAS 369             | NKI295   | NKI295 | 369     | Her2 | 39.1  | 1 | 1 | 1 | 1 | 0 |
| PNAS 371 + Nature 77 | NKI295   | NKI295 | 371     | Her2 | 23.6  | 1 | 0 | 0 | 1 | 1 |
| PNAS 375             | NKI295   | NKI295 | 375     | Her2 | 209.1 | 0 | 0 | 0 | 0 | 0 |
| PNAS 392             | NKI295   | NKI295 | 392     | Her2 | 74.1  | 0 | 0 | 0 | 0 | 0 |
| PNAS 396             | NKI295   | NKI295 | 396     | Her2 | 122.8 | 0 | 0 | 0 | 0 | 0 |
| PNAS 62 + Nature 62  | NKI295   | NKI295 | 62      | Her2 | 9.7   | 1 | 0 | 1 | 1 | 1 |
| PNAS 76 + Nature 76  | NKI295   | NKI295 | 76      | Her2 | 25.5  | 1 | 0 | 0 | 1 | 0 |
| GSM308257            | GSE12276 | EMC192 | chemo2  | LumA | 25    | 1 | 0 | 0 | 1 | 0 |
| GSM308260            | GSE12276 | EMC192 | chemo5  | LumA | 20    | 1 | 0 | 0 | 1 | 0 |
| GSM308263            | GSE12276 | EMC192 | chemo8  | LumA | 69    | 1 | 0 | 0 | 0 | 1 |
| GSM308268            | GSE12276 | EMC192 | chemo13 | LumA | 38    | 1 | 0 | 1 | 1 | 0 |
| GSM308288            | GSE12276 | EMC192 | chemo33 | LumA | 10    | 1 | 0 | 0 | 0 | 1 |
| GSM308292            | GSE12276 | EMC192 | chemo37 | LumA | 99    | 1 | 0 | 0 | 1 | 1 |
| GSM308293            | GSE12276 | EMC192 | chemo38 | LumA | 5     | 1 | 0 | 0 | 0 | 1 |
| GSM308300            | GSE12276 | EMC192 | chemo45 | LumA | 29    | 1 | 0 | 0 | 1 | 1 |
| GSM308304            | GSE12276 | EMC192 | chemo49 | LumA | 54    | 1 | 0 | 0 | 0 | 1 |
| GSM308315            | GSE12276 | EMC192 | chemo60 | LumA | 60    | 1 | 0 | 1 | 1 | 1 |
| GSM308318            | GSE12276 | EMC192 | chemo62 | LumA | 42    | 1 | 0 | 1 | 0 | 0 |
| GSM308327            | GSE12276 | EMC192 | chemo71 | LumA | 73    | 0 | 0 | 0 | 0 | 0 |
| GSM308332            | GSE12276 | EMC192 | chemo76 | LumA | 38    | 1 | 0 | 0 | 0 | 0 |
| GSM308337            | GSE12276 | EMC192 | chemo81 | LumA | 39    | 0 | 0 | 0 | 0 | 0 |
| GSM308345            | GSE12276 | EMC192 | chemo89 | LumA | 30    | 1 | 0 | 0 | 0 | 1 |
| GSM308351            | GSE12276 | EMC192 | chemo95 | LumA | 30    | 0 | 0 | 0 | 0 | 0 |

|           |          |        |          |      |    |   |   |   |   |   |
|-----------|----------|--------|----------|------|----|---|---|---|---|---|
| GSM308353 | GSE12276 | EMC192 | chemo97  | LumA | 64 | 0 | 0 | 0 | 0 | 0 |
| GSM308358 | GSE12276 | EMC192 | chemo102 | LumA | 0  | 1 | 0 | 0 | 1 | 0 |
| GSM308360 | GSE12276 | EMC192 | chemo104 | LumA | 39 | 1 | 0 | 0 | 0 | 1 |
| GSM308363 | GSE12276 | EMC192 | chemo107 | LumA | 22 | 1 | 0 | 0 | 1 | 0 |
| GSM308367 | GSE12276 | EMC192 | chemo111 | LumA | 40 | 1 | 0 | 0 | 1 | 1 |
| GSM308368 | GSE12276 | EMC192 | chemo112 | LumA | 48 | 1 | 0 | 0 | 1 | 1 |
| GSM308369 | GSE12276 | EMC192 | chemo113 | LumA | 38 | 1 | 0 | 0 | 1 | 1 |
| GSM308371 | GSE12276 | EMC192 | chemo115 | LumA | 13 | 1 | 0 | 0 | 1 | 1 |
| GSM308373 | GSE12276 | EMC192 | chemo117 | LumA | 9  | 1 | 0 | 0 | 0 | 1 |
| GSM308382 | GSE12276 | EMC192 | chemo126 | LumA | 46 | 1 | 0 | 0 | 1 | 1 |
| GSM308383 | GSE12276 | EMC192 | chemo127 | LumA | 9  | 1 | 0 | 0 | 1 | 1 |
| GSM308384 | GSE12276 | EMC192 | chemo128 | LumA | 32 | 1 | 0 | 0 | 1 | 0 |
| GSM308406 | GSE12276 | EMC192 | chemo150 | LumA | 58 | 0 | 0 | 0 | 0 | 0 |
| GSM308409 | GSE12276 | EMC192 | chemo153 | LumA | 0  | 0 | 0 | 0 | 0 | 0 |
| GSM308410 | GSE12276 | EMC192 | chemo154 | LumA | 38 | 1 | 0 | 0 | 1 | 0 |
| GSM308413 | GSE12276 | EMC192 | BV1      | LumA | 49 | 1 | 1 | 0 | 1 | 0 |
| GSM308414 | GSE12276 | EMC192 | BV2      | LumA | 97 | 1 | 0 | 0 | 1 | 0 |
| GSM308416 | GSE12276 | EMC192 | BV4      | LumA | 53 | 1 | 0 | 0 | 1 | 0 |
| GSM308417 | GSE12276 | EMC192 | BV5      | LumA | 23 | 1 | 0 | 0 | 1 | 0 |
| GSM308418 | GSE12276 | EMC192 | BV6      | LumA | 25 | 1 | 0 | 0 | 1 | 0 |
| GSM308422 | GSE12276 | EMC192 | BV10     | LumA | 16 | 1 | 0 | 0 | 1 | 0 |
| GSM308428 | GSE12276 | EMC192 | BV16     | LumA | 17 | 1 | 0 | 0 | 1 | 0 |
| GSM308432 | GSE12276 | EMC192 | BV20     | LumA | 40 | 1 | 0 | 0 | 1 | 0 |
| GSM308433 | GSE12276 | EMC192 | BV21     | LumA | 44 | 1 | 0 | 0 | 1 | 0 |
| GSM308434 | GSE12276 | EMC192 | BV22     | LumA | 47 | 1 | 0 | 0 | 0 | 0 |
| GSM308436 | GSE12276 | EMC192 | BV24     | LumA | 21 | 1 | 0 | 0 | 1 | 0 |
| GSM308437 | GSE12276 | EMC192 | BV25     | LumA | 35 | 1 | 0 | 0 | 1 | 0 |
| GSM308441 | GSE12276 | EMC192 | BV29     | LumA | 42 | 1 | 0 | 0 | 1 | 0 |
| GSM308442 | GSE12276 | EMC192 | BV30     | LumA | 18 | 1 | 0 | 0 | 0 | 0 |
| GSM308444 | GSE12276 | EMC192 | BV32     | LumA | 16 | 1 | 0 | 0 | 1 | 0 |
| GSM308445 | GSE12276 | EMC192 | BV33     | LumA | 30 | 1 | 0 | 0 | 1 | 0 |
| GSM308446 | GSE12276 | EMC192 | BV34     | LumA | 42 | 1 | 0 | 0 | 1 | 0 |
| GSM308447 | GSE12276 | EMC192 | BV35     | LumA | 24 | 1 | 0 | 0 | 1 | 0 |
| GSM308448 | GSE12276 | EMC192 | BV36     | LumA | 25 | 1 | 0 | 0 | 1 | 0 |
| GSM308450 | GSE12276 | EMC192 | BV38     | LumA | 33 | 1 | 0 | 0 | 1 | 0 |
| GSM308451 | GSE12276 | EMC192 | BV39     | LumA | 29 | 1 | 0 | 0 | 1 | 0 |



|           |          |        |      |      |     |   |   |   |   |   |
|-----------|----------|--------|------|------|-----|---|---|---|---|---|
| GSM308452 | GSE12276 | EMC192 | BV40 | LumA | 25  | 1 | 0 | 1 | 1 | 0 |
| GSM308453 | GSE12276 | EMC192 | BV41 | LumA | 83  | 1 | 0 | 0 | 1 | 0 |
| GSM308454 | GSE12276 | EMC192 | BV42 | LumA | 73  | 1 | 0 | 0 | 1 | 0 |
| GSM308458 | GSE12276 | EMC192 | BV46 | LumA | 9   | 1 | 0 | 0 | 1 | 0 |
| GSM308459 | GSE12276 | EMC192 | BV47 | LumA | 7   | 1 | 0 | 0 | 0 | 0 |
| GSM36777  | GSE2034  | EMC286 | 277  | LumA | 79  | 0 | 0 | 0 | 0 | 0 |
| GSM36779  | GSE2034  | EMC286 | 798  | LumA | 132 | 0 | 0 | 0 | 0 | 0 |
| GSM36782  | GSE2034  | EMC286 | 600  | LumA | 66  | 0 | 0 | 0 | 0 | 0 |
| GSM36783  | GSE2034  | EMC286 | 601  | LumA | 52  | 0 | 0 | 0 | 0 | 0 |
| GSM36790  | GSE2034  | EMC286 | 286  | LumA | 107 | 0 | 0 | 0 | 0 | 0 |
| GSM36791  | GSE2034  | EMC286 | 287  | LumA | 79  | 0 | 0 | 0 | 0 | 0 |
| GSM36803  | GSE2034  | EMC286 | 613  | LumA | 93  | 0 | 0 | 0 | 0 | 0 |
| GSM36804  | GSE2034  | EMC286 | 614  | LumA | 88  | 0 | 0 | 0 | 0 | 0 |
| GSM36806  | GSE2034  | EMC286 | 615  | LumA | 92  | 0 | 0 | 0 | 0 | 0 |
| GSM36812  | GSE2034  | EMC286 | 621  | LumA | 80  | 0 | 0 | 0 | 0 | 0 |
| GSM36815  | GSE2034  | EMC286 | 625  | LumA | 72  | 1 | 0 | 0 | 1 | 0 |
| GSM36825  | GSE2034  | EMC286 | 631  | LumA | 99  | 0 | 0 | 0 | 0 | 0 |
| GSM36830  | GSE2034  | EMC286 | 634  | LumA | 117 | 0 | 0 | 0 | 0 | 0 |
| GSM36831  | GSE2034  | EMC286 | 716  | LumA | 87  | 0 | 0 | 0 | 0 | 0 |
| GSM36832  | GSE2034  | EMC286 | 635  | LumA | 119 | 0 | 0 | 0 | 0 | 0 |
| GSM36836  | GSE2034  | EMC286 | 15   | LumA | 99  | 0 | 0 | 0 | 0 | 0 |
| GSM36839  | GSE2034  | EMC286 | 19   | LumA | 32  | 1 | 0 | 0 | 1 | 0 |
| GSM36840  | GSE2034  | EMC286 | 848  | LumA | 86  | 0 | 0 | 0 | 0 | 0 |
| GSM36845  | GSE2034  | EMC286 | 642  | LumA | 54  | 0 | 0 | 0 | 0 | 0 |
| GSM36848  | GSE2034  | EMC286 | 726  | LumA | 105 | 0 | 0 | 0 | 0 | 0 |
| GSM36849  | GSE2034  | EMC286 | 808  | LumA | 110 | 0 | 0 | 0 | 0 | 0 |
| GSM36850  | GSE2034  | EMC286 | 727  | LumA | 121 | 0 | 0 | 0 | 0 | 0 |
| GSM36852  | GSE2034  | EMC286 | 809  | LumA | 107 | 0 | 0 | 0 | 0 | 0 |
| GSM36853  | GSE2034  | EMC286 | 728  | LumA | 105 | 0 | 0 | 0 | 0 | 0 |
| GSM36859  | GSE2034  | EMC286 | 22   | LumA | 130 | 0 | 0 | 0 | 0 | 0 |
| GSM36866  | GSE2034  | EMC286 | 815  | LumA | 107 | 0 | 0 | 0 | 0 | 0 |
| GSM36867  | GSE2034  | EMC286 | 817  | LumA | 108 | 0 | 0 | 0 | 0 | 0 |
| GSM36868  | GSE2034  | EMC286 | 737  | LumA | 123 | 0 | 0 | 0 | 0 | 0 |
| GSM36869  | GSE2034  | EMC286 | 738  | LumA | 126 | 0 | 0 | 0 | 0 | 0 |
| GSM36871  | GSE2034  | EMC286 | 32   | LumA | 84  | 0 | 0 | 0 | 0 | 0 |
| GSM36895  | GSE2034  | EMC286 | 747  | LumA | 96  | 0 | 0 | 0 | 0 | 0 |

|          |         |        |     |      |     |   |   |   |   |   |
|----------|---------|--------|-----|------|-----|---|---|---|---|---|
| GSM36896 | GSE2034 | EMC286 | 40  | LumA | 102 | 0 | 0 | 0 | 0 | 0 |
| GSM36907 | GSE2034 | EMC286 | 114 | LumA | 86  | 0 | 0 | 0 | 0 | 0 |
| GSM36910 | GSE2034 | EMC286 | 751 | LumA | 125 | 0 | 0 | 0 | 0 | 0 |
| GSM36913 | GSE2034 | EMC286 | 754 | LumA | 109 | 0 | 0 | 0 | 0 | 0 |
| GSM36914 | GSE2034 | EMC286 | 836 | LumA | 84  | 0 | 0 | 0 | 0 | 0 |
| GSM36916 | GSE2034 | EMC286 | 50  | LumA | 125 | 0 | 0 | 0 | 0 | 0 |
| GSM36919 | GSE2034 | EMC286 | 56  | LumA | 153 | 0 | 0 | 0 | 0 | 0 |
| GSM36925 | GSE2034 | EMC286 | 122 | LumA | 104 | 0 | 0 | 0 | 0 | 0 |
| GSM36928 | GSE2034 | EMC286 | 205 | LumA | 23  | 1 | 0 | 0 | 1 | 0 |
| GSM36942 | GSE2034 | EMC286 | 66  | LumA | 152 | 0 | 0 | 0 | 0 | 0 |
| GSM36945 | GSE2034 | EMC286 | 851 | LumA | 92  | 0 | 0 | 0 | 0 | 0 |
| GSM36950 | GSE2034 | EMC286 | 134 | LumA | 28  | 1 | 0 | 0 | 1 | 0 |
| GSM36951 | GSE2034 | EMC286 | 778 | LumA | 104 | 0 | 0 | 0 | 0 | 0 |
| GSM36957 | GSE2034 | EMC286 | 138 | LumA | 47  | 1 | 0 | 0 | 1 | 0 |
| GSM36970 | GSE2034 | EMC286 | 762 | LumA | 116 | 0 | 0 | 0 | 0 | 0 |
| GSM36971 | GSE2034 | EMC286 | 140 | LumA | 19  | 1 | 0 | 0 | 1 | 0 |
| GSM36973 | GSE2034 | EMC286 | 141 | LumA | 25  | 1 | 0 | 1 | 0 | 0 |
| GSM36976 | GSE2034 | EMC286 | 226 | LumA | 38  | 1 | 0 | 0 | 1 | 0 |
| GSM36980 | GSE2034 | EMC286 | 783 | LumA | 122 | 0 | 0 | 0 | 0 | 0 |
| GSM36983 | GSE2034 | EMC286 | 866 | LumA | 75  | 1 | 0 | 0 | 1 | 0 |
| GSM36986 | GSE2034 | EMC286 | 868 | LumA | 77  | 1 | 0 | 1 | 0 | 0 |
| GSM36990 | GSE2034 | EMC286 | 82  | LumA | 143 | 0 | 0 | 0 | 0 | 0 |
| GSM36994 | GSE2034 | EMC286 | 89  | LumA | 2   | 1 | 0 | 0 | 1 | 0 |
| GSM36998 | GSE2034 | EMC286 | 233 | LumA | 5   | 0 | 0 | 0 | 0 | 0 |
| GSM36999 | GSE2034 | EMC286 | 234 | LumA | 37  | 0 | 0 | 0 | 0 | 0 |
| GSM37005 | GSE2034 | EMC286 | 870 | LumA | 56  | 0 | 0 | 0 | 0 | 0 |
| GSM37008 | GSE2034 | EMC286 | 874 | LumA | 70  | 1 | 0 | 0 | 1 | 0 |
| GSM37010 | GSE2034 | EMC286 | 794 | LumA | 101 | 0 | 0 | 0 | 0 | 0 |
| GSM37011 | GSE2034 | EMC286 | 876 | LumA | 60  | 1 | 0 | 1 | 1 | 0 |
| GSM37012 | GSE2034 | EMC286 | 795 | LumA | 132 | 0 | 0 | 0 | 0 | 0 |
| GSM37013 | GSE2034 | EMC286 | 877 | LumA | 66  | 1 | 0 | 0 | 1 | 0 |
| GSM37015 | GSE2034 | EMC286 | 797 | LumA | 122 | 0 | 0 | 0 | 0 | 0 |
| GSM37024 | GSE2034 | EMC286 | 861 | LumA | 95  | 0 | 0 | 0 | 0 | 0 |
| GSM37025 | GSE2034 | EMC286 | 99  | LumA | 107 | 0 | 0 | 0 | 0 | 0 |
| GSM37026 | GSE2034 | EMC286 | 240 | LumA | 36  | 1 | 0 | 0 | 1 | 0 |
| GSM37028 | GSE2034 | EMC286 | 244 | LumA | 39  | 0 | 0 | 0 | 0 | 0 |

|                       |         |        |        |      |       |   |   |   |   |    |
|-----------------------|---------|--------|--------|------|-------|---|---|---|---|----|
| GSM37032              | GSE2034 | EMC286 | 883    | LumA | 86    | 0 | 0 | 0 | 0 | 0  |
| GSM37033              | GSE2034 | EMC286 | 887    | LumA | 161   | 0 | 0 | 0 | 0 | 0  |
| GSM37039              | GSE2034 | EMC286 | 254    | LumA | 48    | 1 | 0 | 0 | 1 | 0  |
| GSM37059              | GSE2034 | EMC286 | 272    | LumA | 83    | 0 | 0 | 0 | 0 | 0  |
| GSM37061              | GSE2034 | EMC286 | 275    | LumA | 105   | 0 | 0 | 0 | 0 | 0  |
| GSM50036              | GSE2603 | MSK82  | B52.T  | LumA | 109.8 | 0 | 0 | 0 | 0 | NA |
| GSM50047              | GSE2603 | MSK82  | B68.T  | LumA | 64.9  | 0 | 0 | 0 | 0 | NA |
| GSM50049              | GSE2603 | MSK82  | B71.T  | LumA | 66    | 0 | 0 | 0 | 0 | NA |
| GSM50051              | GSE2603 | MSK82  | B74.T  | LumA | 45.2  | 0 | 0 | 0 | 0 | NA |
| GSM50053              | GSE2603 | MSK82  | B76.T  | LumA | 47.6  | 0 | 0 | 0 | 0 | NA |
| GSM50068              | GSE2603 | MSK82  | B51.T  | LumA | 41.8  | 1 | 0 | 1 | 0 | NA |
| GSM50074              | GSE2603 | MSK82  | B104.T | LumA | 87.8  | 0 | 0 | 0 | 0 | NA |
| GSM50080              | GSE2603 | MSK82  | B78.T  | LumA | 87    | 0 | 0 | 0 | 0 | NA |
| GSM50081              | GSE2603 | MSK82  | B79.T  | LumA | 60.8  | 0 | 0 | 0 | 0 | NA |
| GSM50083              | GSE2603 | MSK82  | B82.T  | LumA | 87.4  | 0 | 0 | 0 | 0 | NA |
| GSM50084              | GSE2603 | MSK82  | B83.T  | LumA | 76.8  | 0 | 0 | 0 | 0 | NA |
| GSM50090              | GSE2603 | MSK82  | B90.T  | LumA | 81.5  | 0 | 0 | 0 | 0 | NA |
| GSM50095              | GSE2603 | MSK82  | B108.T | LumA | 78.5  | 1 | 1 | 0 | 0 | NA |
| GSM50098              | GSE2603 | MSK82  | B113.T | LumA | 30.8  | 1 | 0 | 0 | 1 | NA |
| GSM50099              | GSE2603 | MSK82  | B81.T  | LumA | 15.6  | 1 | 0 | 0 | 1 | NA |
| GSM50100              | GSE2603 | MSK82  | B88.T  | LumA | 69.7  | 0 | 0 | 0 | 0 | NA |
| GSM50101              | GSE2603 | MSK82  | B92.T  | LumA | 76.3  | 1 | 0 | 0 | 1 | NA |
| GSM50105              | GSE2603 | MSK82  | B99.T  | LumA | 86.3  | 0 | 0 | 0 | 0 | NA |
| GSM50108              | GSE2603 | MSK82  | B11.T  | LumA | 47.5  | 0 | 0 | 0 | 0 | NA |
| GSM50111              | GSE2603 | MSK82  | B14.T  | LumA | 87.6  | 0 | 0 | 0 | 0 | NA |
| GSM50114              | GSE2603 | MSK82  | B17.T  | LumA | 15.6  | 1 | 0 | 0 | 1 | NA |
| GSM50116              | GSE2603 | MSK82  | B1.T   | LumA | 43    | 0 | 0 | 0 | 0 | NA |
| GSM50120              | GSE2603 | MSK82  | B27.T  | LumA | 44.2  | 0 | 0 | 0 | 0 | NA |
| PNAS 118 + Nature 118 | NKI295  | NKI295 | 118    | LumA | 62.8  | 0 | 0 | 0 | 0 | 0  |
| PNAS 120 + Nature 120 | NKI295  | NKI295 | 120    | LumA | 121.2 | 0 | 0 | 0 | 0 | 0  |
| PNAS 122 + Nature 1   | NKI295  | NKI295 | 122    | LumA | 177.8 | 0 | 0 | 0 | 0 | 0  |
| PNAS 123 + Nature 5   | NKI295  | NKI295 | 123    | LumA | 171.1 | 0 | 0 | 0 | 0 | 0  |
| PNAS 124 + Nature 10  | NKI295  | NKI295 | 124    | LumA | 79.7  | 0 | 0 | 0 | 0 | 0  |
| PNAS 125              | NKI295  | NKI295 | 125    | LumA | 93    | 0 | 0 | 0 | 0 | 0  |
| PNAS 128              | NKI295  | NKI295 | 128    | LumA | 104.9 | 0 | 0 | 0 | 0 | 0  |
| PNAS 129              | NKI295  | NKI295 | 129    | LumA | 90.8  | 0 | 0 | 0 | 0 | 0  |

|                      |        |        |     |      |       |   |   |   |   |   |
|----------------------|--------|--------|-----|------|-------|---|---|---|---|---|
| PNAS 133 + Nature 18 | NKI295 | NKI295 | 133 | LumA | 103.8 | 0 | 0 | 0 | 0 | 0 |
| PNAS 137             | NKI295 | NKI295 | 137 | LumA | 184   | 0 | 0 | 0 | 0 | 0 |
| PNAS 14 + Nature 14  | NKI295 | NKI295 | 14  | LumA | 98.8  | 0 | 0 | 0 | 0 | 0 |
| PNAS 140             | NKI295 | NKI295 | 140 | LumA | 66.7  | 0 | 0 | 0 | 0 | 0 |
| PNAS 145             | NKI295 | NKI295 | 145 | LumA | 65.8  | 0 | 0 | 0 | 0 | 0 |
| PNAS 148             | NKI295 | NKI295 | 148 | LumA | 220.1 | 0 | 0 | 0 | 0 | 0 |
| PNAS 154             | NKI295 | NKI295 | 154 | LumA | 181.3 | 0 | 0 | 0 | 0 | 0 |
| PNAS 155             | NKI295 | NKI295 | 155 | LumA | 11.2  | 1 | 0 | 0 | 0 | 1 |
| PNAS 156             | NKI295 | NKI295 | 156 | LumA | 211.9 | 0 | 0 | 0 | 0 | 0 |
| PNAS 157             | NKI295 | NKI295 | 157 | LumA | 94.5  | 0 | 0 | 0 | 0 | 0 |
| PNAS 161             | NKI295 | NKI295 | 161 | LumA | 97.5  | 1 | 0 | 0 | 1 | 0 |
| PNAS 167             | NKI295 | NKI295 | 167 | LumA | 183.9 | 0 | 0 | 0 | 0 | 0 |
| PNAS 17 + Nature 17  | NKI295 | NKI295 | 17  | LumA | 94.4  | 0 | 0 | 0 | 0 | 0 |
| PNAS 170             | NKI295 | NKI295 | 170 | LumA | 160.2 | 0 | 0 | 0 | 0 | 0 |
| PNAS 176             | NKI295 | NKI295 | 176 | LumA | 150.9 | 0 | 0 | 0 | 0 | 0 |
| PNAS 183             | NKI295 | NKI295 | 183 | LumA | 142.3 | 0 | 0 | 0 | 0 | 0 |
| PNAS 188             | NKI295 | NKI295 | 188 | LumA | 135.2 | 0 | 0 | 0 | 0 | 0 |
| PNAS 190             | NKI295 | NKI295 | 190 | LumA | 143.1 | 0 | 0 | 0 | 0 | 0 |
| PNAS 191             | NKI295 | NKI295 | 191 | LumA | 152.8 | 0 | 0 | 0 | 0 | 0 |
| PNAS 193             | NKI295 | NKI295 | 193 | LumA | 142   | 0 | 0 | 0 | 0 | 0 |
| PNAS 196             | NKI295 | NKI295 | 196 | LumA | 134.3 | 0 | 0 | 0 | 0 | 0 |
| PNAS 200             | NKI295 | NKI295 | 200 | LumA | 129.2 | 0 | 0 | 0 | 0 | 0 |
| PNAS 207             | NKI295 | NKI295 | 207 | LumA | 115.8 | 0 | 0 | 0 | 0 | 0 |
| PNAS 214             | NKI295 | NKI295 | 214 | LumA | 89.7  | 1 | 1 | 0 | 0 | 0 |
| PNAS 220             | NKI295 | NKI295 | 220 | LumA | 123.9 | 0 | 0 | 0 | 0 | 0 |
| PNAS 231 + Nature 54 | NKI295 | NKI295 | 231 | LumA | 43    | 1 | 0 | 0 | 1 | 0 |
| PNAS 233             | NKI295 | NKI295 | 233 | LumA | 169.5 | 0 | 0 | 0 | 0 | 0 |
| PNAS 235             | NKI295 | NKI295 | 235 | LumA | 78.2  | 0 | 0 | 0 | 0 | 0 |
| PNAS 239             | NKI295 | NKI295 | 239 | LumA | 97.1  | 0 | 0 | 0 | 0 | 0 |
| PNAS 243             | NKI295 | NKI295 | 243 | LumA | 119.8 | 0 | 0 | 0 | 0 | 0 |
| PNAS 250 + Nature 21 | NKI295 | NKI295 | 250 | LumA | 136.4 | 0 | 0 | 0 | 0 | 0 |
| PNAS 26 + Nature 26  | NKI295 | NKI295 | 26  | LumA | 83.6  | 0 | 0 | 0 | 0 | 0 |
| PNAS 261             | NKI295 | NKI295 | 261 | LumA | 103.1 | 0 | 0 | 0 | 0 | 0 |
| PNAS 27 + Nature 27  | NKI295 | NKI295 | 27  | LumA | 62.2  | 0 | 0 | 0 | 0 | 0 |
| PNAS 271             | NKI295 | NKI295 | 271 | LumA | 84.3  | 0 | 0 | 0 | 0 | 0 |
| PNAS 272             | NKI295 | NKI295 | 272 | LumA | 87    | 0 | 0 | 0 | 0 | 0 |

|                      |        |        |     |      |       |   |   |   |   |   |
|----------------------|--------|--------|-----|------|-------|---|---|---|---|---|
| PNAS 274             | NKI295 | NKI295 | 274 | LumA | 71.1  | 0 | 0 | 0 | 0 | 0 |
| PNAS 275             | NKI295 | NKI295 | 275 | LumA | 0.7   | 0 | 0 | 0 | 0 | 0 |
| PNAS 277             | NKI295 | NKI295 | 277 | LumA | 61.4  | 0 | 0 | 0 | 0 | 0 |
| PNAS 280             | NKI295 | NKI295 | 280 | LumA | 63.5  | 0 | 0 | 0 | 0 | 0 |
| PNAS 281             | NKI295 | NKI295 | 281 | LumA | 88.1  | 0 | 0 | 0 | 0 | 0 |
| PNAS 282             | NKI295 | NKI295 | 282 | LumA | 68.9  | 0 | 0 | 0 | 0 | 0 |
| PNAS 285             | NKI295 | NKI295 | 285 | LumA | 69.3  | 0 | 0 | 0 | 0 | 0 |
| PNAS 287             | NKI295 | NKI295 | 287 | LumA | 72.8  | 0 | 0 | 0 | 0 | 0 |
| PNAS 29 + Nature 29  | NKI295 | NKI295 | 29  | LumA | 136.7 | 0 | 0 | 0 | 0 | 0 |
| PNAS 290             | NKI295 | NKI295 | 290 | LumA | 59.7  | 0 | 0 | 0 | 0 | 0 |
| PNAS 292 + Nature 19 | NKI295 | NKI295 | 292 | LumA | 100.4 | 0 | 0 | 0 | 0 | 0 |
| PNAS 295             | NKI295 | NKI295 | 295 | LumA | 66.7  | 0 | 0 | 0 | 0 | 0 |
| PNAS 297             | NKI295 | NKI295 | 297 | LumA | 115.2 | 0 | 0 | 0 | 0 | 0 |
| PNAS 298             | NKI295 | NKI295 | 298 | LumA | 113.5 | 0 | 0 | 0 | 0 | 0 |
| PNAS 303             | NKI295 | NKI295 | 303 | LumA | 110.3 | 0 | 0 | 0 | 0 | 0 |
| PNAS 313             | NKI295 | NKI295 | 313 | LumA | 72.7  | 1 | 0 | 0 | 0 | 0 |
| PNAS 315             | NKI295 | NKI295 | 315 | LumA | 98.9  | 0 | 0 | 0 | 0 | 0 |
| PNAS 323             | NKI295 | NKI295 | 323 | LumA | 105.6 | 0 | 0 | 0 | 0 | 0 |
| PNAS 328             | NKI295 | NKI295 | 328 | LumA | 66.9  | 0 | 0 | 0 | 0 | 0 |
| PNAS 329             | NKI295 | NKI295 | 329 | LumA | 69.7  | 0 | 0 | 0 | 0 | 0 |
| PNAS 334             | NKI295 | NKI295 | 334 | LumA | 92.3  | 0 | 0 | 0 | 0 | 0 |
| PNAS 336             | NKI295 | NKI295 | 336 | LumA | 88.9  | 0 | 0 | 0 | 0 | 0 |
| PNAS 343             | NKI295 | NKI295 | 343 | LumA | 79.3  | 0 | 0 | 0 | 0 | 0 |
| PNAS 345             | NKI295 | NKI295 | 345 | LumA | 83.9  | 0 | 0 | 0 | 0 | 0 |
| PNAS 348             | NKI295 | NKI295 | 348 | LumA | 74.1  | 0 | 0 | 0 | 0 | 0 |
| PNAS 352             | NKI295 | NKI295 | 352 | LumA | 69.7  | 0 | 0 | 0 | 0 | 0 |
| PNAS 354             | NKI295 | NKI295 | 354 | LumA | 73.9  | 0 | 0 | 0 | 0 | 0 |
| PNAS 356             | NKI295 | NKI295 | 356 | LumA | 74.6  | 0 | 0 | 0 | 0 | 0 |
| PNAS 357             | NKI295 | NKI295 | 357 | LumA | 69.9  | 0 | 0 | 0 | 0 | 0 |
| PNAS 358             | NKI295 | NKI295 | 358 | LumA | 74.9  | 0 | 0 | 0 | 0 | 0 |
| PNAS 361             | NKI295 | NKI295 | 361 | LumA | 64.2  | 0 | 0 | 0 | 0 | 0 |
| PNAS 365             | NKI295 | NKI295 | 365 | LumA | 209.8 | 0 | 0 | 0 | 0 | 0 |
| PNAS 366             | NKI295 | NKI295 | 366 | LumA | 205.8 | 0 | 0 | 0 | 0 | 0 |
| PNAS 370             | NKI295 | NKI295 | 370 | LumA | 120   | 0 | 0 | 0 | 0 | 0 |
| PNAS 388             | NKI295 | NKI295 | 388 | LumA | 86.7  | 0 | 0 | 0 | 0 | 0 |
| PNAS 39 + Nature 39  | NKI295 | NKI295 | 39  | LumA | 132.2 | 0 | 0 | 0 | 0 | 0 |

|                       |          |        |          |      |       |   |   |   |   |   |
|-----------------------|----------|--------|----------|------|-------|---|---|---|---|---|
| PNAS 390              | NKI295   | NKI295 | 390      | LumA | 81.6  | 0 | 0 | 0 | 0 | 0 |
| PNAS 391              | NKI295   | NKI295 | 391      | LumA | 72.2  | 0 | 0 | 0 | 0 | 0 |
| PNAS 394              | NKI295   | NKI295 | 394      | LumA | 68.5  | 0 | 0 | 0 | 0 | 0 |
| PNAS 395              | NKI295   | NKI295 | 395      | LumA | 134.5 | 1 | 0 | 0 | 1 | 0 |
| PNAS 397 + Nature 105 | NKI295   | NKI295 | 397      | LumA | 57.2  | 1 | 0 | 0 | 1 | 1 |
| PNAS 403              | NKI295   | NKI295 | 403      | LumA | 81.1  | 0 | 0 | 0 | 0 | 0 |
| PNAS 45 + Nature 45   | NKI295   | NKI295 | 45       | LumA | 13.1  | 1 | 0 | 0 | 1 | 1 |
| PNAS 6 + Nature 6     | NKI295   | NKI295 | 6        | LumA | 133.9 | 0 | 0 | 0 | 0 | 0 |
| PNAS 60 + Nature 60   | NKI295   | NKI295 | 60       | LumA | 58.7  | 1 | 1 | 1 | 1 | 0 |
| PNAS 61 + Nature 61   | NKI295   | NKI295 | 61       | LumA | 32.2  | 1 | 1 | 0 | 1 | 0 |
| PNAS 9 + Nature 9     | NKI295   | NKI295 | 9        | LumA | 123.5 | 0 | 0 | 0 | 0 | 0 |
| GSM308262             | GSE12276 | EMC192 | chemo7   | LumB | 30    | 1 | 0 | 1 | 1 | 0 |
| GSM308264             | GSE12276 | EMC192 | chemo9   | LumB | 37    | 0 | 0 | 0 | 0 | 0 |
| GSM308270             | GSE12276 | EMC192 | chemo15  | LumB | 7     | 1 | 0 | 0 | 0 | 0 |
| GSM308289             | GSE12276 | EMC192 | chemo34  | LumB | 61    | 1 | 0 | 0 | 1 | 0 |
| GSM308296             | GSE12276 | EMC192 | chemo41  | LumB | 32    | 0 | 0 | 0 | 0 | 0 |
| GSM308297             | GSE12276 | EMC192 | chemo42  | LumB | 14    | 1 | 0 | 0 | 1 | 0 |
| GSM308298             | GSE12276 | EMC192 | chemo43  | LumB | 14    | 1 | 0 | 0 | 1 | 0 |
| GSM308310             | GSE12276 | EMC192 | chemo55  | LumB | 36    | 0 | 0 | 0 | 0 | 0 |
| GSM308321             | GSE12276 | EMC192 | chemo65  | LumB | 0     | 1 | 0 | 0 | 1 | 0 |
| GSM308322             | GSE12276 | EMC192 | chemo66  | LumB | 27    | 1 | 0 | 0 | 1 | 0 |
| GSM308325             | GSE12276 | EMC192 | chemo69  | LumB | 13    | 1 | 0 | 0 | 0 | 0 |
| GSM308331             | GSE12276 | EMC192 | chemo75  | LumB | 0     | 1 | 0 | 1 | 1 | 1 |
| GSM308347             | GSE12276 | EMC192 | chemo91  | LumB | 6     | 1 | 0 | 0 | 1 | 1 |
| GSM308359             | GSE12276 | EMC192 | chemo103 | LumB | 36    | 1 | 0 | 0 | 0 | 0 |
| GSM308361             | GSE12276 | EMC192 | chemo105 | LumB | 27    | 1 | 0 | 1 | 0 | 0 |
| GSM308372             | GSE12276 | EMC192 | chemo116 | LumB | 85    | 1 | 1 | 0 | 0 | 0 |
| GSM308375             | GSE12276 | EMC192 | chemo119 | LumB | 28    | 1 | 0 | 0 | 1 | 1 |
| GSM308399             | GSE12276 | EMC192 | chemo143 | LumB | 38    | 1 | 0 | 0 | 1 | 0 |
| GSM308420             | GSE12276 | EMC192 | BV8      | LumB | 36    | 1 | 0 | 0 | 1 | 0 |
| GSM308421             | GSE12276 | EMC192 | BV9      | LumB | 35    | 1 | 0 | 0 | 1 | 0 |
| GSM308423             | GSE12276 | EMC192 | BV11     | LumB | 35    | 1 | 0 | 1 | 1 | 0 |
| GSM308424             | GSE12276 | EMC192 | BV12     | LumB | 23    | 1 | 0 | 0 | 1 | 0 |
| GSM308425             | GSE12276 | EMC192 | BV13     | LumB | 14    | 1 | 0 | 0 | 1 | 0 |
| GSM308426             | GSE12276 | EMC192 | BV14     | LumB | 9     | 1 | 0 | 0 | 1 | 0 |
| GSM308427             | GSE12276 | EMC192 | BV15     | LumB | 42    | 1 | 0 | 1 | 0 | 0 |

|           |          |        |      |      |     |   |   |   |   |   |
|-----------|----------|--------|------|------|-----|---|---|---|---|---|
| GSM308429 | GSE12276 | EMC192 | BV17 | LumB | 5   | 1 | 0 | 0 | 1 | 0 |
| GSM308435 | GSE12276 | EMC192 | BV23 | LumB | 26  | 1 | 0 | 0 | 0 | 0 |
| GSM308439 | GSE12276 | EMC192 | BV27 | LumB | 4   | 1 | 0 | 0 | 1 | 0 |
| GSM308455 | GSE12276 | EMC192 | BV43 | LumB | 31  | 1 | 0 | 0 | 1 | 0 |
| GSM308456 | GSE12276 | EMC192 | BV44 | LumB | 28  | 1 | 0 | 0 | 0 | 1 |
| GSM308457 | GSE12276 | EMC192 | BV45 | LumB | 18  | 1 | 0 | 0 | 1 | 0 |
| GSM36785  | GSE2034  | EMC286 | 605  | LumB | 57  | 0 | 0 | 0 | 0 | 0 |
| GSM36787  | GSE2034  | EMC286 | 284  | LumB | 72  | 0 | 0 | 0 | 0 | 0 |
| GSM36789  | GSE2034  | EMC286 | 285  | LumB | 51  | 1 | 0 | 0 | 1 | 0 |
| GSM36792  | GSE2034  | EMC286 | 288  | LumB | 71  | 1 | 0 | 0 | 1 | 0 |
| GSM36800  | GSE2034  | EMC286 | 8    | LumB | 37  | 1 | 0 | 1 | 0 | 0 |
| GSM36801  | GSE2034  | EMC286 | 9    | LumB | 125 | 0 | 0 | 0 | 0 | 0 |
| GSM36810  | GSE2034  | EMC286 | 847  | LumB | 105 | 0 | 0 | 0 | 0 | 0 |
| GSM36820  | GSE2034  | EMC286 | 749  | LumB | 141 | 0 | 0 | 0 | 0 | 0 |
| GSM36829  | GSE2034  | EMC286 | 714  | LumB | 157 | 0 | 0 | 0 | 0 | 0 |
| GSM36841  | GSE2034  | EMC286 | 767  | LumB | 134 | 0 | 0 | 0 | 0 | 0 |
| GSM36843  | GSE2034  | EMC286 | 641  | LumB | 77  | 0 | 0 | 0 | 0 | 0 |
| GSM36844  | GSE2034  | EMC286 | 804  | LumB | 121 | 0 | 0 | 0 | 0 | 0 |
| GSM36856  | GSE2034  | EMC286 | 729  | LumB | 86  | 0 | 0 | 0 | 0 | 0 |
| GSM36857  | GSE2034  | EMC286 | 648  | LumB | 95  | 0 | 0 | 0 | 0 | 0 |
| GSM36864  | GSE2034  | EMC286 | 810  | LumB | 84  | 0 | 0 | 0 | 0 | 0 |
| GSM36873  | GSE2034  | EMC286 | 34   | LumB | 100 | 0 | 0 | 0 | 0 | 0 |
| GSM36878  | GSE2034  | EMC286 | 760  | LumB | 98  | 0 | 0 | 0 | 0 | 0 |
| GSM36881  | GSE2034  | EMC286 | 104  | LumB | 11  | 1 | 0 | 0 | 1 | 0 |
| GSM36888  | GSE2034  | EMC286 | 108  | LumB | 28  | 1 | 0 | 1 | 1 | 0 |
| GSM36908  | GSE2034  | EMC286 | 115  | LumB | 15  | 1 | 0 | 1 | 1 | 0 |
| GSM36911  | GSE2034  | EMC286 | 913  | LumB | 80  | 1 | 0 | 0 | 1 | 0 |
| GSM36921  | GSE2034  | EMC286 | 200  | LumB | 108 | 0 | 0 | 0 | 0 | 0 |
| GSM36922  | GSE2034  | EMC286 | 201  | LumB | 113 | 0 | 0 | 0 | 0 | 0 |
| GSM36924  | GSE2034  | EMC286 | 203  | LumB | 29  | 1 | 0 | 0 | 1 | 1 |
| GSM36946  | GSE2034  | EMC286 | 130  | LumB | 26  | 1 | 0 | 0 | 1 | 0 |
| GSM36947  | GSE2034  | EMC286 | 213  | LumB | 16  | 1 | 0 | 0 | 1 | 0 |
| GSM36948  | GSE2034  | EMC286 | 133  | LumB | 87  | 0 | 0 | 0 | 0 | 0 |
| GSM36963  | GSE2034  | EMC286 | 698  | LumB | 60  | 0 | 0 | 0 | 0 | 0 |
| GSM36974  | GSE2034  | EMC286 | 223  | LumB | 23  | 1 | 0 | 1 | 0 | 0 |
| GSM36979  | GSE2034  | EMC286 | 863  | LumB | 107 | 0 | 0 | 0 | 0 | 0 |

|                       |         |        |        |      |      |   |   |   |   |    |
|-----------------------|---------|--------|--------|------|------|---|---|---|---|----|
| GSM36984              | GSE2034 | EMC286 | 785    | LumB | 138  | 0 | 0 | 0 | 0 | 0  |
| GSM36985              | GSE2034 | EMC286 | 867    | LumB | 55   | 0 | 0 | 0 | 0 | 0  |
| GSM36988              | GSE2034 | EMC286 | 789    | LumB | 96   | 0 | 0 | 0 | 0 | 0  |
| GSM36989              | GSE2034 | EMC286 | 81     | LumB | 11   | 1 | 0 | 1 | 1 | 1  |
| GSM36997              | GSE2034 | EMC286 | 231    | LumB | 44   | 1 | 1 | 0 | 1 | 0  |
| GSM37003              | GSE2034 | EMC286 | 237    | LumB | 19   | 1 | 0 | 0 | 1 | 0  |
| GSM37004              | GSE2034 | EMC286 | 239    | LumB | 35   | 1 | 0 | 0 | 1 | 0  |
| GSM37006              | GSE2034 | EMC286 | 871    | LumB | 71   | 1 | 0 | 0 | 1 | 0  |
| GSM37007              | GSE2034 | EMC286 | 873    | LumB | 59   | 1 | 0 | 0 | 1 | 0  |
| GSM37018              | GSE2034 | EMC286 | 91     | LumB | 20   | 1 | 1 | 0 | 1 | 1  |
| GSM37029              | GSE2034 | EMC286 | 246    | LumB | 47   | 1 | 0 | 1 | 0 | 0  |
| GSM37030              | GSE2034 | EMC286 | 247    | LumB | 44   | 0 | 0 | 0 | 0 | 0  |
| GSM37031              | GSE2034 | EMC286 | 249    | LumB | 18   | 1 | 0 | 1 | 1 | 0  |
| GSM37035              | GSE2034 | EMC286 | 250    | LumB | 14   | 1 | 0 | 0 | 1 | 0  |
| GSM37037              | GSE2034 | EMC286 | 253    | LumB | 19   | 1 | 0 | 0 | 1 | 0  |
| GSM37038              | GSE2034 | EMC286 | 416    | LumB | 60   | 1 | 0 | 1 | 1 | 0  |
| GSM37046              | GSE2034 | EMC286 | 899    | LumB | 86   | 0 | 0 | 0 | 0 | 0  |
| GSM37057              | GSE2034 | EMC286 | 270    | LumB | 59   | 0 | 0 | 0 | 0 | 0  |
| GSM37062              | GSE2034 | EMC286 | 276    | LumB | 54   | 0 | 0 | 0 | 0 | 0  |
| GSM50037              | GSE2603 | MSK82  | B54.T  | LumB | 82.3 | 0 | 0 | 0 | 0 | NA |
| GSM50038              | GSE2603 | MSK82  | B55.T  | LumB | 77.6 | 0 | 0 | 0 | 0 | NA |
| GSM50039              | GSE2603 | MSK82  | B56.T  | LumB | 85   | 0 | 0 | 0 | 0 | NA |
| GSM50043              | GSE2603 | MSK82  | B62.T  | LumB | 62.8 | 0 | 0 | 0 | 0 | NA |
| GSM50044              | GSE2603 | MSK82  | B63.T  | LumB | 67.4 | 0 | 0 | 0 | 0 | NA |
| GSM50059              | GSE2603 | MSK82  | B42.T  | LumB | 91.6 | 0 | 0 | 0 | 0 | NA |
| GSM50062              | GSE2603 | MSK82  | B45.T  | LumB | 36.8 | 0 | 0 | 0 | 0 | NA |
| GSM50087              | GSE2603 | MSK82  | B86.T  | LumB | 99.7 | 0 | 0 | 0 | 0 | NA |
| GSM50091              | GSE2603 | MSK82  | B91.T  | LumB | 86.3 | 0 | 0 | 0 | 0 | NA |
| GSM50097              | GSE2603 | MSK82  | B111.T | LumB | 64.7 | 1 | 0 | 0 | 1 | NA |
| GSM50115              | GSE2603 | MSK82  | B18.T  | LumB | 53   | 0 | 0 | 0 | 0 | NA |
| GSM50118              | GSE2603 | MSK82  | B24.T  | LumB | 75.4 | 0 | 0 | 0 | 0 | NA |
| GSM50121              | GSE2603 | MSK82  | B28.T  | LumB | 49.4 | 0 | 0 | 0 | 0 | NA |
| GSM50122              | GSE2603 | MSK82  | B29.T  | LumB | 38.9 | 1 | 0 | 0 | 1 | NA |
| GSM50128              | GSE2603 | MSK82  | B4.T   | LumB | 27.6 | 0 | 0 | 0 | 0 | NA |
| GSM50131              | GSE2603 | MSK82  | B8.T   | LumB | 55.1 | 1 | 0 | 0 | 1 | NA |
| PNAS 107 + Nature 107 | NKI295  | NKI295 | 107    | LumB | 30.5 | 0 | 0 | 0 | 0 | 0  |



|                       |        |        |     |      |       |   |   |   |   |   |
|-----------------------|--------|--------|-----|------|-------|---|---|---|---|---|
| PNAS 110 + Nature 110 | NKI295 | NKI295 | 110 | LumB | 26    | 1 | 0 | 0 | 1 | 1 |
| PNAS 111 + Nature 111 | NKI295 | NKI295 | 111 | LumB | 15.2  | 1 | 0 | 0 | 1 | 0 |
| PNAS 117 + Nature 117 | NKI295 | NKI295 | 117 | LumB | 63.6  | 0 | 0 | 0 | 0 | 0 |
| PNAS 126              | NKI295 | NKI295 | 126 | LumB | 75.8  | 1 | 1 | 0 | 1 | 0 |
| PNAS 127              | NKI295 | NKI295 | 127 | LumB | 56    | 0 | 0 | 0 | 0 | 0 |
| PNAS 146              | NKI295 | NKI295 | 146 | LumB | 43.9  | 1 | 1 | 0 | 0 | 1 |
| PNAS 150              | NKI295 | NKI295 | 150 | LumB | 11.5  | 1 | 0 | 1 | 1 | 0 |
| PNAS 159              | NKI295 | NKI295 | 159 | LumB | 53.4  | 1 | 0 | 0 | 1 | 1 |
| PNAS 162              | NKI295 | NKI295 | 162 | LumB | 183.8 | 0 | 0 | 0 | 0 | 0 |
| PNAS 163              | NKI295 | NKI295 | 163 | LumB | 189.8 | 0 | 0 | 0 | 0 | 0 |
| PNAS 165              | NKI295 | NKI295 | 165 | LumB | 125.3 | 0 | 0 | 0 | 0 | 0 |
| PNAS 166              | NKI295 | NKI295 | 166 | LumB | 19.4  | 1 | 1 | 0 | 0 | 1 |
| PNAS 169              | NKI295 | NKI295 | 169 | LumB | 178.6 | 0 | 0 | 0 | 0 | 0 |
| PNAS 174              | NKI295 | NKI295 | 174 | LumB | 165   | 0 | 0 | 0 | 0 | 0 |
| PNAS 185              | NKI295 | NKI295 | 185 | LumB | 88    | 0 | 0 | 0 | 0 | 0 |
| PNAS 192              | NKI295 | NKI295 | 192 | LumB | 32.4  | 1 | 0 | 0 | 1 | 1 |
| PNAS 203              | NKI295 | NKI295 | 203 | LumB | 132.4 | 0 | 0 | 0 | 0 | 0 |
| PNAS 205              | NKI295 | NKI295 | 205 | LumB | 121.7 | 0 | 0 | 0 | 0 | 0 |
| PNAS 218              | NKI295 | NKI295 | 218 | LumB | 28.1  | 1 | 0 | 0 | 1 | 1 |
| PNAS 227 + Nature 49  | NKI295 | NKI295 | 227 | LumB | 40.3  | 0 | 0 | 0 | 0 | 0 |
| PNAS 240 + Nature 66  | NKI295 | NKI295 | 240 | LumB | 49.1  | 1 | 0 | 0 | 0 | 0 |
| PNAS 247              | NKI295 | NKI295 | 247 | LumB | 67.6  | 0 | 0 | 0 | 0 | 0 |
| PNAS 252 + Nature 15  | NKI295 | NKI295 | 252 | LumB | 109.5 | 1 | 0 | 0 | 1 | 1 |
| PNAS 254 + Nature 63  | NKI295 | NKI295 | 254 | LumB | 55.1  | 1 | 0 | 0 | 1 | 0 |
| PNAS 264              | NKI295 | NKI295 | 264 | LumB | 87    | 0 | 0 | 0 | 0 | 0 |
| PNAS 283              | NKI295 | NKI295 | 283 | LumB | 63.9  | 0 | 0 | 0 | 0 | 0 |
| PNAS 293              | NKI295 | NKI295 | 293 | LumB | 75.8  | 0 | 0 | 0 | 0 | 0 |
| PNAS 294              | NKI295 | NKI295 | 294 | LumB | 73.7  | 0 | 0 | 0 | 0 | 0 |
| PNAS 300              | NKI295 | NKI295 | 300 | LumB | 34.2  | 1 | 0 | 0 | 1 | 1 |
| PNAS 301              | NKI295 | NKI295 | 301 | LumB | 112   | 0 | 0 | 0 | 0 | 0 |
| PNAS 302              | NKI295 | NKI295 | 302 | LumB | 21.4  | 0 | 0 | 0 | 0 | 0 |
| PNAS 305              | NKI295 | NKI295 | 305 | LumB | 114.6 | 0 | 0 | 0 | 0 | 0 |
| PNAS 309              | NKI295 | NKI295 | 309 | LumB | 102.7 | 0 | 0 | 0 | 0 | 0 |
| PNAS 311              | NKI295 | NKI295 | 311 | LumB | 50.6  | 1 | 0 | 0 | 1 | 1 |
| PNAS 312              | NKI295 | NKI295 | 312 | LumB | 109.2 | 0 | 0 | 0 | 0 | 0 |
| PNAS 314              | NKI295 | NKI295 | 314 | LumB | 38.6  | 0 | 0 | 0 | 0 | 0 |

|                       |          |        |         |        |       |   |   |   |   |   |
|-----------------------|----------|--------|---------|--------|-------|---|---|---|---|---|
| PNAS 317 + Nature 47  | NKI295   | NKI295 | 317     | LumB   | 25.7  | 1 | 1 | 1 | 1 | 0 |
| PNAS 320              | NKI295   | NKI295 | 320     | LumB   | 118.7 | 0 | 0 | 0 | 0 | 0 |
| PNAS 322              | NKI295   | NKI295 | 322     | LumB   | 80.5  | 0 | 0 | 0 | 0 | 0 |
| PNAS 327              | NKI295   | NKI295 | 327     | LumB   | 55.5  | 1 | 0 | 0 | 1 | 0 |
| PNAS 331              | NKI295   | NKI295 | 331     | LumB   | 25.9  | 1 | 0 | 0 | 1 | 1 |
| PNAS 337              | NKI295   | NKI295 | 337     | LumB   | 81.8  | 0 | 0 | 0 | 0 | 0 |
| PNAS 339              | NKI295   | NKI295 | 339     | LumB   | 199.1 | 0 | 0 | 0 | 0 | 0 |
| PNAS 340              | NKI295   | NKI295 | 340     | LumB   | 37.5  | 1 | 0 | 1 | 1 | 0 |
| PNAS 342 + Nature 25  | NKI295   | NKI295 | 342     | LumB   | 184.2 | 0 | 0 | 0 | 0 | 0 |
| PNAS 349              | NKI295   | NKI295 | 349     | LumB   | 77.6  | 0 | 0 | 0 | 0 | 0 |
| PNAS 353              | NKI295   | NKI295 | 353     | LumB   | 78.6  | 0 | 0 | 0 | 0 | 0 |
| PNAS 362              | NKI295   | NKI295 | 362     | LumB   | 63.1  | 0 | 0 | 0 | 0 | 0 |
| PNAS 363              | NKI295   | NKI295 | 363     | LumB   | 59.7  | 1 | 0 | 0 | 1 | 0 |
| PNAS 374              | NKI295   | NKI295 | 374     | LumB   | 32.2  | 1 | 0 | 0 | 1 | 1 |
| PNAS 378              | NKI295   | NKI295 | 378     | LumB   | 167   | 0 | 0 | 0 | 0 | 0 |
| PNAS 379 + Nature 115 | NKI295   | NKI295 | 379     | LumB   | 166.4 | 0 | 0 | 0 | 0 | 0 |
| PNAS 38 + Nature 38   | NKI295   | NKI295 | 38      | LumB   | 88.2  | 0 | 0 | 0 | 0 | 0 |
| PNAS 380 + Nature 33  | NKI295   | NKI295 | 380     | LumB   | 152.9 | 0 | 0 | 0 | 0 | 0 |
| PNAS 381              | NKI295   | NKI295 | 381     | LumB   | 147.1 | 0 | 0 | 0 | 0 | 0 |
| PNAS 385              | NKI295   | NKI295 | 385     | LumB   | 23.4  | 1 | 1 | 1 | 0 | 0 |
| PNAS 387              | NKI295   | NKI295 | 387     | LumB   | 98.6  | 0 | 0 | 0 | 0 | 0 |
| PNAS 389              | NKI295   | NKI295 | 389     | LumB   | 41    | 1 | 0 | 0 | 0 | 0 |
| PNAS 393              | NKI295   | NKI295 | 393     | LumB   | 66.9  | 0 | 0 | 0 | 0 | 0 |
| PNAS 4 + Nature 4     | NKI295   | NKI295 | 4       | LumB   | 156   | 0 | 0 | 0 | 0 | 0 |
| PNAS 401 + Nature 55  | NKI295   | NKI295 | 401     | LumB   | 18.3  | 1 | 0 | 0 | 0 | 0 |
| PNAS 51 + Nature 51   | NKI295   | NKI295 | 51      | LumB   | 58.9  | 1 | 0 | 0 | 1 | 0 |
| PNAS 58 + Nature 58   | NKI295   | NKI295 | 58      | LumB   | 13.5  | 1 | 0 | 0 | 1 | 1 |
| PNAS 59 + Nature 59   | NKI295   | NKI295 | 59      | LumB   | 55.6  | 1 | 1 | 1 | 0 | 0 |
| PNAS 72 + Nature 72   | NKI295   | NKI295 | 72      | LumB   | 36.3  | 1 | 0 | 0 | 1 | 0 |
| GSM308277             | GSE12276 | EMC192 | chemo22 | Normal | 22    | 1 | 0 | 0 | 0 | 0 |
| GSM308284             | GSE12276 | EMC192 | chemo29 | Normal | 46    | 1 | 0 | 0 | 0 | 0 |
| GSM308287             | GSE12276 | EMC192 | chemo32 | Normal | 42    | 1 | 0 | 0 | 1 | 0 |
| GSM308294             | GSE12276 | EMC192 | chemo39 | Normal | 21    | 1 | 0 | 1 | 1 | 0 |
| GSM308299             | GSE12276 | EMC192 | chemo44 | Normal | 18    | 1 | 1 | 0 | 0 | 1 |
| GSM308316             | GSE12276 | EMC192 | chemo61 | Normal | 0     | 1 | 1 | 1 | 1 | 1 |
| GSM308340             | GSE12276 | EMC192 | chemo84 | Normal | 60    | 1 | 0 | 1 | 1 | 0 |

|           |          |        |      |        |     |   |   |   |   |   |
|-----------|----------|--------|------|--------|-----|---|---|---|---|---|
| GSM308431 | GSE12276 | EMC192 | BV19 | Normal | 23  | 1 | 0 | 0 | 1 | 0 |
| GSM308438 | GSE12276 | EMC192 | BV26 | Normal | 35  | 1 | 0 | 0 | 1 | 0 |
| GSM36784  | GSE2034  | EMC286 | 602  | Normal | 57  | 1 | 0 | 0 | 1 | 0 |
| GSM36786  | GSE2034  | EMC286 | 606  | Normal | 66  | 0 | 0 | 0 | 0 | 0 |
| GSM36793  | GSE2034  | EMC286 | 3    | Normal | 101 | 0 | 0 | 0 | 0 | 0 |
| GSM36796  | GSE2034  | EMC286 | 5    | Normal | 118 | 0 | 0 | 0 | 0 | 0 |
| GSM36807  | GSE2034  | EMC286 | 616  | Normal | 88  | 0 | 0 | 0 | 0 | 0 |
| GSM36813  | GSE2034  | EMC286 | 540  | Normal | 49  | 1 | 0 | 0 | 1 | 0 |
| GSM36819  | GSE2034  | EMC286 | 629  | Normal | 131 | 0 | 0 | 0 | 0 | 0 |
| GSM36842  | GSE2034  | EMC286 | 640  | Normal | 81  | 0 | 0 | 0 | 0 | 0 |
| GSM36861  | GSE2034  | EMC286 | 28   | Normal | 155 | 0 | 0 | 0 | 0 | 0 |
| GSM36874  | GSE2034  | EMC286 | 35   | Normal | 30  | 1 | 0 | 0 | 1 | 0 |
| GSM36880  | GSE2034  | EMC286 | 103  | Normal | 97  | 0 | 0 | 0 | 0 | 0 |
| GSM36882  | GSE2034  | EMC286 | 105  | Normal | 99  | 0 | 0 | 0 | 0 | 0 |
| GSM36883  | GSE2034  | EMC286 | 849  | Normal | 88  | 0 | 0 | 0 | 0 | 0 |
| GSM36885  | GSE2034  | EMC286 | 106  | Normal | 40  | 1 | 0 | 0 | 1 | 0 |
| GSM36887  | GSE2034  | EMC286 | 900  | Normal | 108 | 0 | 0 | 0 | 0 | 0 |
| GSM36894  | GSE2034  | EMC286 | 909  | Normal | 109 | 0 | 0 | 0 | 0 | 0 |
| GSM36897  | GSE2034  | EMC286 | 41   | Normal | 25  | 1 | 0 | 0 | 0 | 1 |
| GSM36898  | GSE2034  | EMC286 | 212  | Normal | 7   | 1 | 0 | 0 | 1 | 0 |
| GSM36915  | GSE2034  | EMC286 | 839  | Normal | 97  | 0 | 0 | 0 | 0 | 0 |
| GSM36917  | GSE2034  | EMC286 | 54   | Normal | 144 | 0 | 0 | 0 | 0 | 0 |
| GSM36943  | GSE2034  | EMC286 | 67   | Normal | 19  | 1 | 0 | 0 | 1 | 0 |
| GSM36958  | GSE2034  | EMC286 | 139  | Normal | 111 | 0 | 0 | 0 | 0 | 0 |
| GSM36962  | GSE2034  | EMC286 | 70   | Normal | 114 | 0 | 0 | 0 | 0 | 0 |
| GSM36965  | GSE2034  | EMC286 | 72   | Normal | 134 | 0 | 0 | 0 | 0 | 0 |
| GSM36978  | GSE2034  | EMC286 | 782  | Normal | 148 | 0 | 0 | 0 | 0 | 0 |
| GSM36982  | GSE2034  | EMC286 | 865  | Normal | 92  | 0 | 0 | 0 | 0 | 0 |
| GSM36987  | GSE2034  | EMC286 | 80   | Normal | 97  | 0 | 0 | 0 | 0 | 0 |
| GSM36993  | GSE2034  | EMC286 | 88   | Normal | 98  | 0 | 0 | 0 | 0 | 0 |
| GSM37001  | GSE2034  | EMC286 | 235  | Normal | 33  | 1 | 0 | 0 | 1 | 0 |
| GSM37019  | GSE2034  | EMC286 | 92   | Normal | 146 | 0 | 0 | 0 | 0 | 0 |
| GSM37041  | GSE2034  | EMC286 | 258  | Normal | 9   | 1 | 0 | 0 | 1 | 0 |
| GSM37048  | GSE2034  | EMC286 | 862  | Normal | 87  | 0 | 0 | 0 | 0 | 0 |
| GSM37056  | GSE2034  | EMC286 | 268  | Normal | 82  | 0 | 0 | 0 | 0 | 0 |
| GSM37060  | GSE2034  | EMC286 | 273  | Normal | 81  | 0 | 0 | 0 | 0 | 0 |

|                       |         |        |        |        |       |   |   |   |   |    |
|-----------------------|---------|--------|--------|--------|-------|---|---|---|---|----|
| GSM50064              | GSE2603 | MSK82  | B47.T  | Normal | 11.3  | 1 | 0 | 1 | 1 | NA |
| GSM50069              | GSE2603 | MSK82  | B73.T  | Normal | 46    | 1 | 1 | 1 | 0 | NA |
| GSM50072              | GSE2603 | MSK82  | B101.T | Normal | 128.9 | 0 | 0 | 0 | 0 | NA |
| GSM50082              | GSE2603 | MSK82  | B80.T  | Normal | 85.3  | 0 | 0 | 0 | 0 | NA |
| GSM50089              | GSE2603 | MSK82  | B89.T  | Normal | 104.9 | 0 | 0 | 0 | 0 | NA |
| GSM50104              | GSE2603 | MSK82  | B96.T  | Normal | 81.2  | 1 | 0 | 0 | 1 | NA |
| PNAS 113 + Nature 113 | NKI295  | NKI295 | 113    | Normal | 12    | 1 | 0 | 0 | 1 | 1  |
| PNAS 138 + Nature 46  | NKI295  | NKI295 | 138    | Normal | 41.7  | 1 | 0 | 0 | 0 | 1  |
| PNAS 139 + Nature 3   | NKI295  | NKI295 | 139    | Normal | 153.2 | 0 | 0 | 0 | 0 | 0  |
| PNAS 142              | NKI295  | NKI295 | 142    | Normal | 181.6 | 0 | 0 | 0 | 0 | 0  |
| PNAS 160              | NKI295  | NKI295 | 160    | Normal | 193.8 | 0 | 0 | 0 | 0 | 0  |
| PNAS 178              | NKI295  | NKI295 | 178    | Normal | 158.1 | 0 | 0 | 0 | 0 | 0  |
| PNAS 187              | NKI295  | NKI295 | 187    | Normal | 150   | 0 | 0 | 0 | 0 | 0  |
| PNAS 198              | NKI295  | NKI295 | 198    | Normal | 133.7 | 0 | 0 | 0 | 0 | 0  |
| PNAS 201              | NKI295  | NKI295 | 201    | Normal | 134.4 | 0 | 0 | 0 | 0 | 0  |
| PNAS 209              | NKI295  | NKI295 | 209    | Normal | 78.8  | 0 | 0 | 0 | 0 | 0  |
| PNAS 221 + Nature 22  | NKI295  | NKI295 | 221    | Normal | 124.5 | 0 | 0 | 0 | 0 | 0  |
| PNAS 224 + Nature 2   | NKI295  | NKI295 | 224    | Normal | 120.2 | 0 | 0 | 0 | 0 | 0  |
| PNAS 256              | NKI295  | NKI295 | 256    | Normal | 107.9 | 0 | 0 | 0 | 0 | 0  |
| PNAS 260              | NKI295  | NKI295 | 260    | Normal | 99.6  | 1 | 0 | 0 | 1 | 0  |
| PNAS 278              | NKI295  | NKI295 | 278    | Normal | 63.7  | 0 | 0 | 0 | 0 | 0  |
| PNAS 28 + Nature 28   | NKI295  | NKI295 | 28     | Normal | 74.9  | 0 | 0 | 0 | 0 | 0  |
| PNAS 318              | NKI295  | NKI295 | 318    | Normal | 28    | 1 | 0 | 0 | 1 | 0  |
| PNAS 346              | NKI295  | NKI295 | 346    | Normal | 85.5  | 0 | 0 | 0 | 0 | 0  |
| PNAS 355              | NKI295  | NKI295 | 355    | Normal | 72.5  | 0 | 0 | 0 | 0 | 0  |
| PNAS 359              | NKI295  | NKI295 | 359    | Normal | 72.2  | 0 | 0 | 0 | 0 | 0  |
| PNAS 360              | NKI295  | NKI295 | 360    | Normal | 66.6  | 0 | 0 | 0 | 0 | 0  |
| PNAS 364              | NKI295  | NKI295 | 364    | Normal | 217   | 0 | 0 | 0 | 0 | 0  |
| PNAS 368              | NKI295  | NKI295 | 368    | Normal | 114.8 | 1 | 1 | 0 | 0 | 0  |
| PNAS 373              | NKI295  | NKI295 | 373    | Normal | 93.3  | 0 | 0 | 0 | 0 | 0  |
| PNAS 383              | NKI295  | NKI295 | 383    | Normal | 133   | 0 | 0 | 0 | 0 | 0  |
| PNAS 404              | NKI295  | NKI295 | 404    | Normal | 90.8  | 0 | 0 | 0 | 0 | 0  |
| PNAS 7 + Nature 7     | NKI295  | NKI295 | 7      | Normal | 121.7 | 0 | 0 | 0 | 0 | 0  |

# Supplemental Figure 3

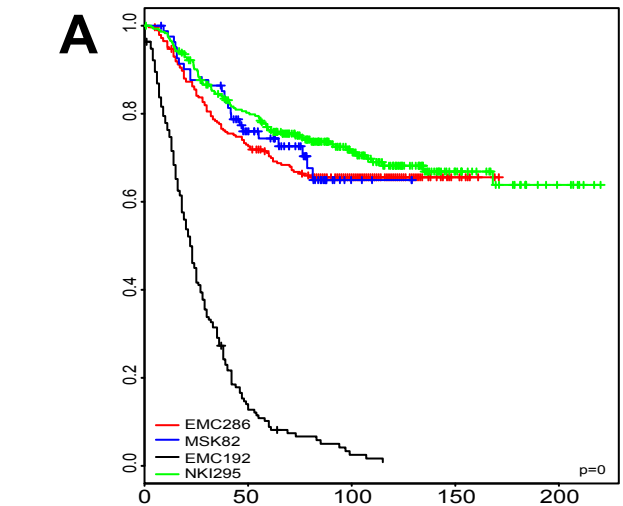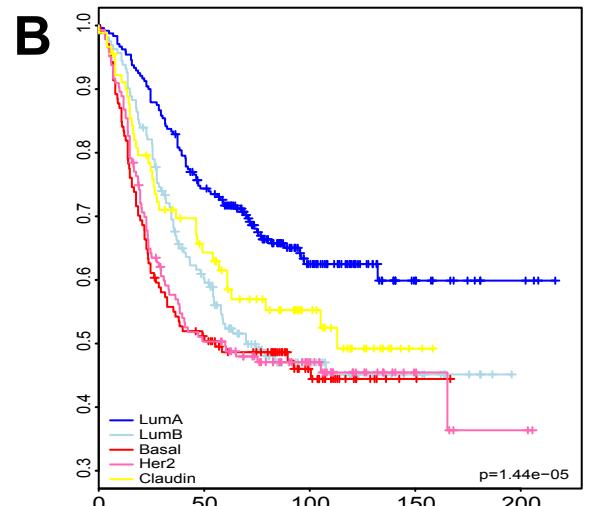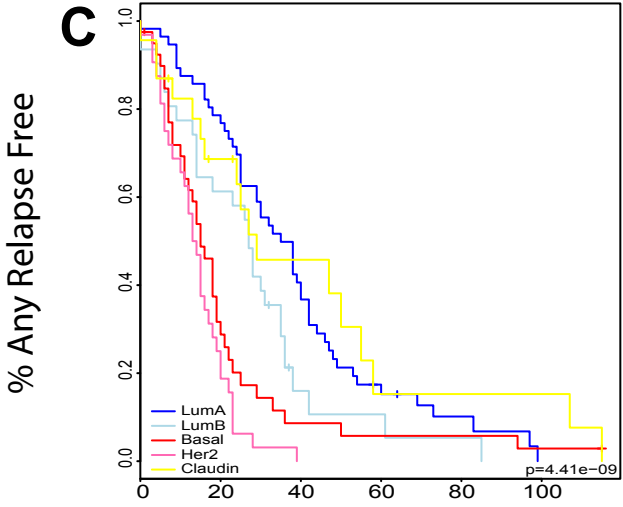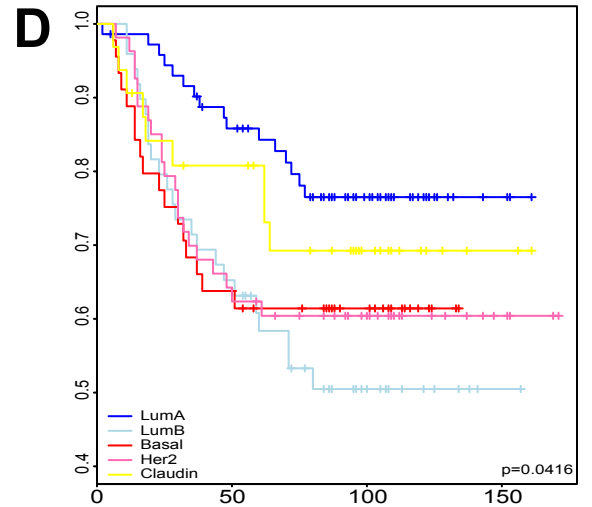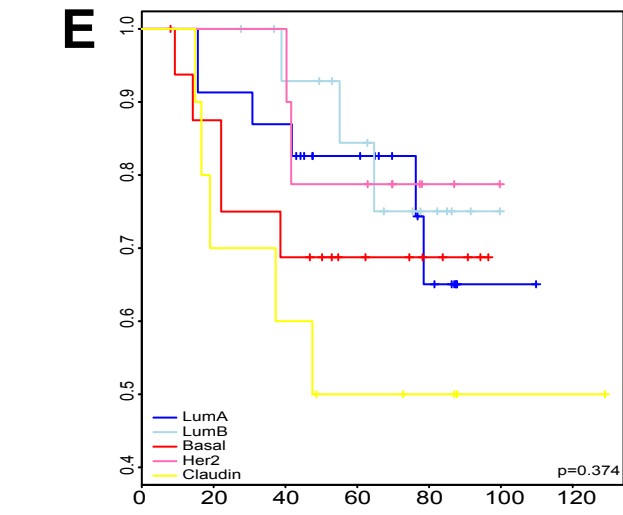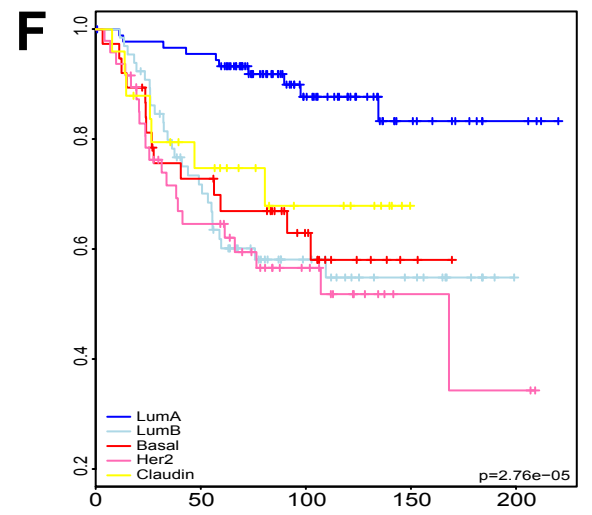

Months

# Supplemental Figure 4

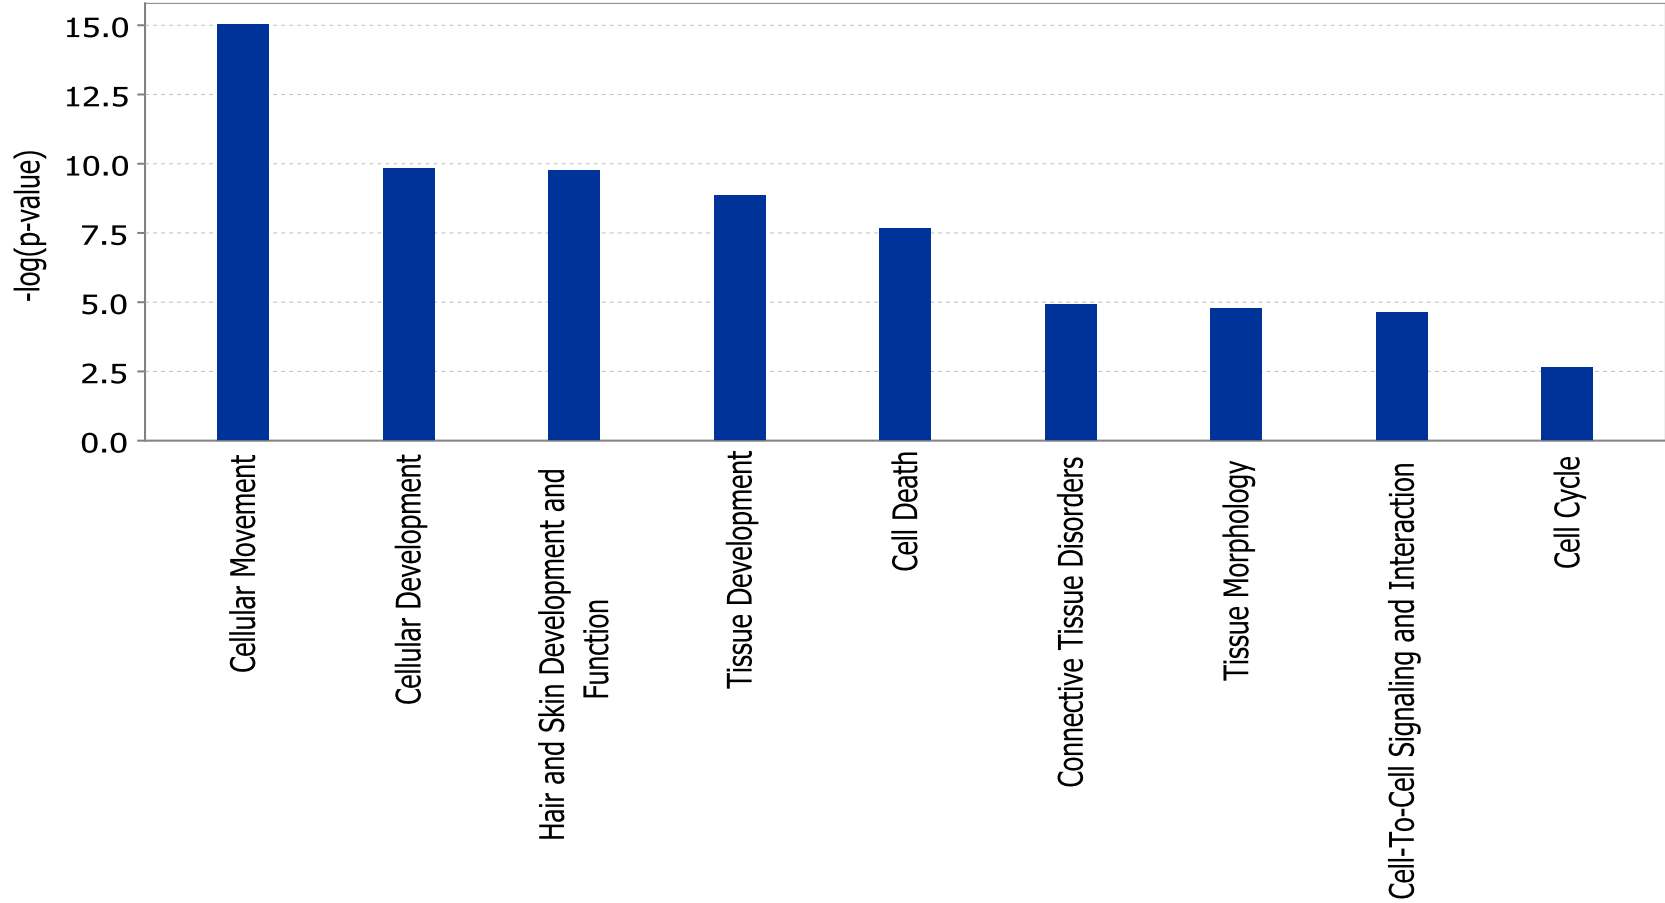

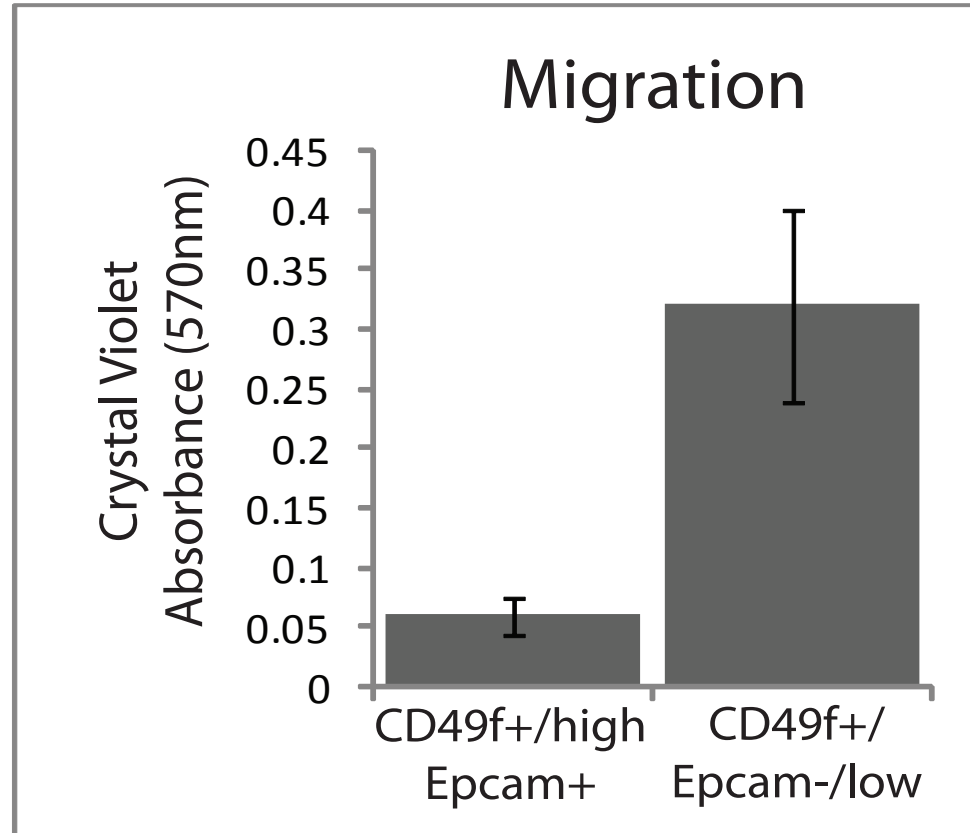

Supplemental Table 4

| Module Name                           | Any Relapse Coefficient | Any Relapse p-value | Brain Relapse Coefficient | Brain Relapse p-value | Lung Relapse Coefficient | Lung Relapse p-value | Bone Relapse Coefficient | Bone Relapse p-value | Liver Relapse Coefficient | Liver Relapse p-value | LN Relapse Coefficient | LN Relapse p-value | Pearson's Correlation with DS | Pearson's Correlation with Proliferation |
|---------------------------------------|-------------------------|---------------------|---------------------------|-----------------------|--------------------------|----------------------|--------------------------|----------------------|---------------------------|-----------------------|------------------------|--------------------|-------------------------------|------------------------------------------|
| Classification_Prognosis_485_Survival | <b>0.2506</b>           | 1.50E-06            | <b>0.7262</b>             | 9.88E-07              | <b>0.8129</b>            | 1.43E-14             | <b>0.0063</b>            | 9.25E-01             | <b>0.3088</b>             | 1.75E-03              | <b>0.6560</b>          | 2.44E-03           | -0.5650                       | 0.7246                                   |
| VEGF_13genes                          | <b>0.2971</b>           | 5.21E-09            | <b>0.7241</b>             | 2.88E-08              | <b>0.8307</b>            | 0.00E+00             | <b>0.0963</b>            | 1.57E-01             | <b>0.2705</b>             | 5.89E-03              | <b>0.3745</b>          | 4.65E-02           | -0.6236                       | 0.3134                                   |
| PRC2_targets                          | <b>0.1901</b>           | 2.93E-04            | <b>0.6904</b>             | 1.44E-06              | <b>0.7969</b>            | 3.22E-15             | <b>-0.1212</b>           | 8.73E-02             | <b>0.2423</b>             | 1.30E-02              | <b>0.4752</b>          | 2.07E-02           | -0.7705                       | 0.4609                                   |
| Eed_targets                           | <b>0.1869</b>           | 3.69E-04            | <b>0.6841</b>             | 1.64E-06              | <b>0.7966</b>            | 2.78E-15             | <b>-0.1354</b>           | 5.81E-02             | <b>0.2471</b>             | 1.10E-02              | <b>0.4738</b>          | 2.15E-02           | -0.7779                       | 0.4850                                   |
| H3K27_bound                           | <b>0.1747</b>           | 8.04E-04            | <b>0.6561</b>             | 2.60E-06              | <b>0.7556</b>            | 1.21E-14             | <b>-0.1489</b>           | 3.84E-02             | <b>0.2284</b>             | 1.80E-02              | <b>0.4393</b>          | 2.71E-02           | -0.8090                       | 0.4532                                   |
| NKI_TAM                               | <b>0.2633</b>           | 8.89E-07            | <b>0.6435</b>             | 7.41E-05              | <b>0.6381</b>            | 1.89E-08             | <b>0.1519</b>            | 2.11E-02             | <b>0.3229</b>             | 1.42E-03              | <b>0.7350</b>          | 7.47E-04           | -0.2978                       | 0.8354                                   |
| ESC_CORE                              | <b>0.2634</b>           | 8.18E-07            | <b>0.6409</b>             | 4.59E-05              | <b>0.6965</b>            | 4.58E-10             | <b>0.0937</b>            | 1.57E-01             | <b>0.3295</b>             | 1.17E-03              | <b>0.7094</b>          | 1.31E-03           | -0.4596                       | 0.8173                                   |
| ESC_HUMAN                             | <b>0.2221</b>           | 1.52E-05            | <b>0.6342</b>             | 4.12E-06              | <b>0.7193</b>            | 9.36E-14             | <b>-0.0367</b>           | 5.91E-01             | <b>0.2623</b>             | 6.96E-03              | <b>0.5522</b>          | 4.41E-03           | -0.6820                       | 0.6976                                   |
| ADM_S100A10_A110NDGR1_Cluster         | <b>0.2410</b>           | 2.55E-06            | <b>0.6336</b>             | 2.08E-06              | <b>0.7187</b>            | 4.88E-15             | <b>0.0137</b>            | 8.40E-01             | <b>0.3359</b>             | 4.40E-04              | <b>0.4173</b>          | 2.32E-02           | -0.6838                       | 0.3064                                   |
| Oncogenic_SRC                         | <b>0.1935</b>           | 4.18E-04            | <b>0.6269</b>             | 3.70E-05              | <b>0.8069</b>            | 3.87E-14             | <b>-0.0877</b>           | 2.18E-01             | <b>0.2576</b>             | 1.46E-02              | <b>0.3760</b>          | 1.14E-01           | -0.7071                       | 0.5340                                   |
| ESC_MOUSE                             | <b>0.2482</b>           | 1.89E-06            | <b>0.6126</b>             | 2.70E-05              | <b>0.7340</b>            | 1.65E-12             | <b>0.0310</b>            | 6.41E-01             | <b>0.3235</b>             | 1.01E-03              | <b>0.6585</b>          | 1.16E-03           | -0.5544                       | 0.7844                                   |
| MM_Normal                             | <b>0.2058</b>           | 5.89E-05            | <b>0.6058</b>             | 1.01E-05              | <b>0.7136</b>            | 1.39E-13             | <b>-0.0587</b>           | 3.90E-01             | <b>0.2474</b>             | 1.01E-02              | <b>0.5875</b>          | 2.39E-03           | -0.5983                       | 0.7194                                   |
| MCF7_Baylor_2                         | <b>0.1586</b>           | 2.38E-03            | <b>0.6027</b>             | 3.48E-05              | <b>0.6759</b>            | 3.77E-11             | <b>-0.1247</b>           | 6.69E-02             | <b>0.2159</b>             | 2.52E-02              | <b>0.4276</b>          | 3.59E-02           | -0.7651                       | 0.5179                                   |
| MM_C3Tag                              | <b>0.1907</b>           | 2.27E-04            | <b>0.5879</b>             | 1.91E-05              | <b>0.6776</b>            | 1.80E-12             | <b>-0.0870</b>           | 2.11E-01             | <b>0.2408</b>             | 1.26E-02              | <b>0.5884</b>          | 2.87E-03           | -0.6513                       | 0.6707                                   |
| MM_WapINT3                            | <b>0.0919</b>           | 8.99E-02            | <b>0.5817</b>             | 2.69E-05              | <b>0.6312</b>            | 3.27E-11             | <b>-0.2844</b>           | 2.39E-04             | <b>0.0915</b>             | 3.72E-01              | <b>0.1857</b>          | 4.27E-01           | -0.9088                       | 0.1724                                   |
| Proliferation_Cluster                 | <b>0.2774</b>           | 2.59E-07            | <b>0.5767</b>             | 2.15E-04              | <b>0.6885</b>            | 6.63E-10             | <b>0.1360</b>            | 4.18E-02             | <b>0.3171</b>             | 1.86E-03              | <b>0.6954</b>          | 1.69E-03           | -0.3390                       | 0.8584                                   |
| ES_exp2                               | <b>0.2278</b>           | 8.73E-06            | <b>0.5720</b>             | 6.44E-05              | <b>0.6089</b>            | 1.58E-09             | <b>0.0872</b>            | 1.76E-01             | <b>0.2921</b>             | 1.79E-03              | <b>0.8145</b>          | 2.49E-03           | -0.2947                       | 0.7424                                   |
| HS_Green10                            | <b>0.2671</b>           | 3.42E-07            | <b>0.5701</b>             | 1.26E-04              | <b>0.6856</b>            | 1.20E-10             | <b>0.1044</b>            | 1.12E-01             | <b>0.3094</b>             | 1.61E-03              | <b>0.7113</b>          | 1.17E-03           | -0.4161                       | 0.8152                                   |
| MM_WAPTag                             | <b>0.1921</b>           | 2.10E-04            | <b>0.5658</b>             | 5.37E-05              | <b>0.7005</b>            | 1.22E-12             | <b>-0.0616</b>           | 3.65E-01             | <b>0.1978</b>             | 4.36E-02              | <b>0.5842</b>          | 3.74E-03           | -0.5176                       | 0.7550                                   |
| MM_Myc                                | <b>0.1506</b>           | 3.56E-03            | <b>0.5614</b>             | 1.80E-05              | <b>0.6690</b>            | 1.61E-13             | <b>-0.2062</b>           | 6.05E-03             | <b>0.1510</b>             | 1.25E-01              | <b>0.4662</b>          | 1.52E-02           | -0.7667                       | 0.5406                                   |
| Bone_Metastasis_Underexpressed        | <b>0.1642</b>           | 1.62E-03            | <b>0.5497</b>             | 3.76E-05              | <b>0.6486</b>            | 1.22E-12             | <b>-0.1515</b>           | 3.67E-02             | <b>0.2192</b>             | 2.30E-02              | <b>0.1970</b>          | 3.44E-01           | -0.8396                       | 0.2752                                   |
| Unknown_10                            | <b>0.2463</b>           | 2.67E-06            | <b>0.5481</b>             | 1.50E-04              | <b>0.5500</b>            | 4.40E-08             | <b>0.1225</b>            | 6.43E-02             | <b>0.4649</b>             | 3.45E-06              | <b>0.1697</b>          | 4.01E-01           | -0.1122                       | 0.3112                                   |
| RB_LOSS                               | <b>0.2590</b>           | 1.34E-06            | <b>0.5467</b>             | 4.01E-04              | <b>0.6395</b>            | 5.96E-09             | <b>0.1290</b>            | 5.25E-02             | <b>0.3186</b>             | 1.79E-03              | <b>0.6553</b>          | 2.31E-03           | -0.3112                       | 0.8523                                   |
| Classification_Prognosis_706          | <b>0.1461</b>           | 4.59E-03            | <b>0.5458</b>             | 6.24E-05              | <b>0.6549</b>            | 5.06E-12             | <b>-0.1761</b>           | 1.34E-02             | <b>0.2235</b>             | 2.09E-02              | <b>0.3105</b>          | 1.06E-01           | -0.7824                       | 0.4943                                   |
| MProliferation                        | <b>0.2605</b>           | 1.30E-06            | <b>0.5328</b>             | 5.33E-04              | <b>0.6449</b>            | 3.59E-09             | <b>0.1268</b>            | 5.90E-02             | <b>0.2899</b>             | 4.23E-03              | <b>0.7264</b>          | 1.82E-03           | -0.3043                       | 0.8496                                   |
| RB_LOH                                | <b>0.2403</b>           | 3.81E-06            | <b>0.5316</b>             | 1.99E-04              | <b>0.6840</b>            | 1.20E-11             | <b>0.0548</b>            | 4.11E-01             | <b>0.2599</b>             | 8.47E-03              | <b>0.6204</b>          | 1.94E-03           | -0.4171                       | 0.7728                                   |
| CIN70                                 | <b>0.2619</b>           | 9.08E-07            | <b>0.5256</b>             | 5.24E-04              | <b>0.6721</b>            | 5.60E-10             | <b>0.1243</b>            | 6.19E-02             | <b>0.3249</b>             | 1.56E-03              | <b>0.7358</b>          | 8.69E-04           | -0.3166                       | 0.8416                                   |
| HS_Red23                              | <b>0.2791</b>           | 2.58E-07            | <b>0.5223</b>             | 8.05E-04              | <b>0.6424</b>            | 7.87E-09             | <b>0.1664</b>            | 1.34E-02             | <b>0.2996</b>             | 3.26E-03              | <b>0.7247</b>          | 1.68E-03           | -0.2771                       | 0.8602                                   |
| MM_Green19                            | <b>0.2420</b>           | 4.62E-06            | <b>0.5057</b>             | 6.33E-04              | <b>0.6506</b>            | 5.51E-10             | <b>0.0882</b>            | 1.85E-01             | <b>0.2615</b>             | 8.92E-03              | <b>0.5696</b>          | 7.98E-03           | -0.3478                       | 0.8217                                   |
| Warm Ischemia Time                    | <b>0.1089</b>           | 4.62E-02            | <b>0.5040</b>             | 4.54E-04              | <b>0.5797</b>            | 2.59E-09             | <b>-0.1322</b>           | 6.64E-02             | <b>0.0579</b>             | 5.87E-01              | <b>-0.0108</b>         | 9.63E-01           | -0.8576                       | 0.0557                                   |
| HS_Red6                               | <b>0.2255</b>           | 1.23E-05            | <b>0.4816</b>             | 9.29E-04              | <b>0.5757</b>            | 2.40E-08             | <b>0.1339</b>            | 3.82E-02             | <b>0.2880</b>             | 3.66E-03              | <b>0.5827</b>          | 4.54E-03           | -0.0676                       | 0.7498                                   |
| WNT                                   | <b>0.0071</b>           | 8.98E-01            | <b>0.4717</b>             | 1.36E-03              | <b>0.4055</b>            | 6.84E-05             | <b>-0.3020</b>           | 3.72E-05             | <b>0.0603</b>             | 5.76E-01              | <b>-0.0106</b>         | 9.62E-01           | -0.6907                       | -0.0811                                  |
| HS_Red1                               | <b>0.1038</b>           | 4.54E-02            | <b>0.4652</b>             | 5.34E-04              | <b>0.5525</b>            | 2.49E-09             | <b>-0.2020</b>           | 5.08E-03             | <b>0.1306</b>             | 1.75E-01              | <b>0.3118</b>          | 1.29E-01           | -0.7212                       | 0.5485                                   |













|                          |                |          |                |          |                |          |                |          |                |          |                |          |        |         |
|--------------------------|----------------|----------|----------------|----------|----------------|----------|----------------|----------|----------------|----------|----------------|----------|--------|---------|
| Oncogenic_RAS            | <b>-0.1695</b> | 1.09E-03 | <b>-0.5983</b> | 6.27E-06 | <b>-0.7043</b> | 1.50E-14 | <b>0.1826</b>  | 1.41E-02 | <b>-0.1735</b> | 7.82E-02 | <b>-0.2853</b> | 1.77E-01 | 0.8438 | -0.3465 |
| HS_Green1                | <b>-0.1652</b> | 1.31E-03 | <b>-0.5991</b> | 1.42E-05 | <b>-0.6645</b> | 6.55E-12 | <b>0.1465</b>  | 3.57E-02 | <b>-0.2141</b> | 2.64E-02 | <b>-0.4872</b> | 1.77E-02 | 0.7460 | -0.5438 |
| Nanog_targets            | <b>-0.2060</b> | 5.30E-05 | <b>-0.6028</b> | 1.00E-05 | <b>-0.6951</b> | 4.17E-13 | <b>0.0637</b>  | 3.48E-01 | <b>-0.2551</b> | 8.15E-03 | <b>-0.5728</b> | 2.91E-03 | 0.6454 | -0.7032 |
| MM_BRCA-Wnt              | <b>-0.1415</b> | 7.49E-03 | <b>-0.6098</b> | 8.37E-06 | <b>-0.6987</b> | 1.82E-13 | <b>0.2388</b>  | 1.79E-03 | <b>-0.1987</b> | 4.53E-02 | <b>-0.3855</b> | 6.65E-02 | 0.8729 | -0.3880 |
| HS_Red2                  | <b>-0.1665</b> | 1.47E-03 | <b>-0.6111</b> | 7.22E-05 | <b>-0.5826</b> | 4.55E-08 | <b>0.0757</b>  | 2.46E-01 | <b>-0.2627</b> | 8.88E-03 | <b>-0.5479</b> | 1.22E-02 | 0.7493 | -0.3906 |
| Surgical_Manipulation    | <b>-0.1473</b> | 5.28E-03 | <b>-0.6146</b> | 1.71E-05 | <b>-0.7607</b> | 1.98E-14 | <b>0.1366</b>  | 5.12E-02 | <b>-0.1623</b> | 1.22E-01 | <b>-0.2636</b> | 2.26E-01 | 0.8544 | -0.2950 |
| LUMINAL_Cluster          | <b>-0.1456</b> | 5.63E-03 | <b>-0.6167</b> | 2.30E-05 | <b>-0.6604</b> | 7.02E-11 | <b>0.1400</b>  | 4.29E-02 | <b>-0.2203</b> | 3.02E-02 | <b>-0.4095</b> | 4.43E-02 | 0.7935 | -0.3973 |
| Genomic_Grade            | <b>-0.2662</b> | 6.43E-07 | <b>-0.6260</b> | 8.09E-05 | <b>-0.7288</b> | 2.11E-10 | <b>-0.0902</b> | 1.70E-01 | <b>-0.3024</b> | 3.05E-03 | <b>-0.6699</b> | 3.28E-03 | 0.4269 | -0.8412 |
| HS_Green25               | <b>-0.1428</b> | 8.25E-03 | <b>-0.6269</b> | 8.61E-06 | <b>-0.8168</b> | 1.11E-16 | <b>0.2424</b>  | 1.76E-03 | <b>-0.0879</b> | 4.17E-01 | <b>-0.4274</b> | 7.23E-02 | 0.8627 | -0.4227 |
| MM_NeuPyMT               | <b>-0.1608</b> | 2.37E-03 | <b>-0.6300</b> | 4.84E-06 | <b>-0.7345</b> | 1.71E-14 | <b>0.2119</b>  | 5.34E-03 | <b>-0.1893</b> | 5.84E-02 | <b>-0.3481</b> | 1.07E-01 | 0.8954 | -0.3705 |
| WNT_Fibroblast           | <b>-0.2280</b> | 1.16E-05 | <b>-0.6309</b> | 7.91E-06 | <b>-0.7135</b> | 4.91E-13 | <b>0.0161</b>  | 8.11E-01 | <b>-0.2628</b> | 6.51E-03 | <b>-0.5839</b> | 1.67E-03 | 0.5390 | -0.7006 |
| Suz12_targets            | <b>-0.1705</b> | 1.19E-03 | <b>-0.6509</b> | 2.84E-06 | <b>-0.7628</b> | 5.11E-15 | <b>0.1718</b>  | 1.97E-02 | <b>-0.2146</b> | 2.82E-02 | <b>-0.4325</b> | 3.58E-02 | 0.8162 | -0.4333 |
| Myc_targets2             | <b>-0.2347</b> | 5.44E-06 | <b>-0.6560</b> | 5.05E-06 | <b>-0.7260</b> | 7.52E-13 | <b>0.0117</b>  | 8.61E-01 | <b>-0.3245</b> | 9.37E-04 | <b>-0.5157</b> | 8.37E-03 | 0.6515 | -0.7089 |
| Stromal_Predict_Outcome  | <b>-0.1932</b> | 2.50E-04 | <b>-0.6571</b> | 3.25E-06 | <b>-0.8187</b> | 1.11E-16 | <b>0.1278</b>  | 7.43E-02 | <b>-0.2032</b> | 4.50E-02 | <b>-0.5255</b> | 1.16E-02 | 0.7097 | -0.5338 |
| Estrogen_Reg             | <b>-0.2066</b> | 1.07E-04 | <b>-0.6839</b> | 1.16E-05 | <b>-0.8642</b> | 2.54E-14 | <b>0.0796</b>  | 2.41E-01 | <b>-0.3577</b> | 4.35E-04 | <b>-0.5104</b> | 1.62E-02 | 0.7323 | -0.4509 |
| SDDP                     | <b>-0.2507</b> | 1.89E-06 | <b>-0.6976</b> | 1.72E-06 | <b>-0.8801</b> | 0.00E+00 | <b>-0.0038</b> | 9.55E-01 | <b>-0.1998</b> | 4.61E-02 | <b>-0.7199</b> | 3.80E-04 | 0.4731 | -0.5370 |
| IGF                      | <b>-0.2389</b> | 3.88E-06 | <b>-0.7050</b> | 1.08E-06 | <b>-0.8244</b> | 1.22E-15 | <b>0.0418</b>  | 5.38E-01 | <b>-0.3166</b> | 1.27E-03 | <b>-0.6046</b> | 2.56E-03 | 0.6987 | -0.6374 |
| MCF7_Baylor_4            | <b>-0.2104</b> | 8.94E-05 | <b>-0.7050</b> | 1.31E-05 | <b>-0.8556</b> | 3.00E-13 | <b>0.0466</b>  | 4.88E-01 | <b>-0.4164</b> | 6.16E-05 | <b>-0.4937</b> | 1.97E-02 | 0.7130 | -0.4505 |
| MCF7_Baylor_1            | <b>-0.2132</b> | 5.28E-05 | <b>-0.7196</b> | 1.37E-06 | <b>-0.8346</b> | 3.55E-15 | <b>0.0719</b>  | 2.98E-01 | <b>-0.3533</b> | 3.93E-04 | <b>-0.4864</b> | 1.64E-02 | 0.7475 | -0.5197 |
| Response predictor MDACC | <b>-0.2048</b> | 2.19E-04 | <b>-0.7562</b> | 4.41E-06 | <b>-0.9425</b> | 3.33E-15 | <b>0.0877</b>  | 2.11E-01 | <b>-0.3476</b> | 1.23E-03 | <b>-0.4818</b> | 5.55E-02 | 0.6529 | -0.5229 |
